# Supplementary material for: Downregulation of circulating miR 802‐5p and miR 194‐5p and upregulation of brain MEF2C along breast cancer brain metastasization
Source: PubMed Central journal article supplement (PMC7053247; doi:10.1002/1878-0261.12632), 2020-02-05
Supplement: MOL2-14-520-s001.pdf [file MOL2-14-520-s001.pdf]

**Supplementary Table 1.** MiRNAs found to be deregulated at 7 days, by NGS analysis.

| <b>miRNA</b>    | <b>Readcounts (control)</b> | <b>Readcounts (4T1)</b> | <b>Foldchange</b> |
|-----------------|-----------------------------|-------------------------|-------------------|
| mmu-miR-182-5p  | 275,538                     | 743,2185                | 2,6973            |
| mmu-miR-375-3p  | 219,5051                    | 1062,712                | 4,8414            |
| mmu-miR-200b-3p | 33,6712                     | 14,95501                | 0,4441            |
| mmu-miR-582-3p  | 14,3938                     | 52,56911                | 3,6522            |
| mmu-miR-204-5p  | 8,7391                      | 18,12728                | 2,0743            |
| mmu-miR-21a-3p  | 17,9922                     | 38,52047                | 2,141             |
| mmu-miR-183-5p  | 8,7391                      | 28,09728                | 3,2151            |
