# Supplementary material for: Downregulation of circulating miR 802‐5p and miR 194‐5p and upregulation of brain MEF2C along breast cancer brain metastasization
Source: PubMed Central journal article supplement (PMC7053247; doi:10.1002/1878-0261.12632), 2020-02-05
Supplement: MOL2-14-520-s002.pdf [file MOL2-14-520-s002.pdf]

**Supplementary Table 2.** MiRNAs found to be deregulated at 10 days, by NGS analysis.

| <b>miRNA</b>      | <b>Readcounts (control)</b> | <b>Readcounts(4T1)</b> | <b>FoldChange</b> |
|-------------------|-----------------------------|------------------------|-------------------|
| mmu-miR-133a-3p   | 2067,333238                 | 5169,2123              | 2,5004            |
| mmu-miR-29a-3p    | 358,8993044                 | 753,1303               | 2,0984            |
| mmu-miR-182-5p    | 446,1271502                 | 2276,1581              | 5,102             |
| mmu-miR-328-3p    | 268,3421516                 | 570,0875               | 2,1245            |
| mmu-miR-146b-5p   | 469,7652306                 | 1370,725               | 2,9179            |
| mmu-miR-375-3p    | 285,9874791                 | 645,5402               | 2,2572            |
| mmu-miR-423-3p    | 112,5305797                 | 250,1119               | 2,2226            |
| mmu-miR-223-3p    | 120,8538474                 | 444,3329               | 3,6766            |
| mmu-miR-34c-5p    | 44,11331896                 | 106,1928               | 2,4073            |
| mmu-miR-205-5p    | 65,92028041                 | 234,7419               | 3,561             |
| mmu-miR-214-3p    | 98,5474899                  | 41,9182                | 0,4254            |
| mmu-miR-125b-1-3p | 33,95893233                 | 177,4537               | 5,2255            |
| mmu-miR-132-3p    | 60,26045835                 | 125,7546               | 2,0869            |
| mmu-miR-429-3p    | 31,62841737                 | 68,4664                | 2,1647            |
| mmu-miR-31-5p     | 44,61271502                 | 107,59                 | 2,4116            |
| mmu-miR-133b-3p   | 28,46557563                 | 74,7541                | 2,6261            |
| mmu-miR-582-3p    | 19,64291184                 | 55,8909                | 2,8453            |
| mmu-miR-1843b-5p  | 26,80092208                 | 74,0555                | 2,7632            |
| mmu-miR-1843a-5p  | 20,30877326                 | 60,0827                | 2,9585            |
| mmu-miR-1843b-5p  |                             |                        |                   |
| mmu-miR-335-5p    | 25,96859531                 | 54,4937                | 2,0984            |
| mmu-miR-204-5p    | 17,31239687                 | 61,48                  | 3,5512            |
| mmu-miR-28a-5p    | 13,31722837                 | 27,9455                | 2,0984            |
| mmu-miR-155-5p    | 19,30998                    | 40,5209                | 2,0984            |
| mmu-miR-21a-3p    | 19,64291                    | 58,6855                | 2,9876            |
| mmu-miR-365-3p    | 12,65137                    | 5,5891                 | 0,4418            |
| mmu-miR-183-5p    | 18,97705                    | 79,6446                | 4,1969            |
| mmu-miR-664-5p    | 10,32085                    | 29,3427                | 2,8431            |
| mmu-miR-330-3p    | 16,3136                     | 36,3291                | 2,2269            |
| mmu-miR-378a-5p   | 13,31723                    | 29,3427                | 2,2034            |
| mmu-miR-431-5p    | 9,654991                    | 2,7945                 | 0,2894            |
| mmu-miR-223-5p    | 11,31964                    | 39,1237                | 3,4563            |
| mmu-miR-339-3p    | 16,3136                     | 33,5346                | 2,0556            |
| mmu-miR-301b-3p   | 10,32085                    | 23,7536                | 2,3015            |
| mmu-miR-345-3p    | 12,65137                    | 26,5482                | 2,0984            |
| mmu-miR-3057-5p   | 15,98067                    | 32,1373                | 2,011             |
| mmu-miR-212-3p    | 5,992753                    | 27,9455                | 4,6632            |
| mmu-miR-30c-1-3p  | 6,658614                    | 27,9455                | 4,1969            |
| mmu-miR-1843a-3p  | 5,326891                    | 22,3564                | 4,1969            |
