# Supplementary material for: Downregulation of circulating miR 802‐5p and miR 194‐5p and upregulation of brain MEF2C along breast cancer brain metastasization
Source: PubMed Central journal article supplement (PMC7053247; doi:10.1002/1878-0261.12632), 2020-02-05
Supplement: MOL2-14-520-s003.pdf [file MOL2-14-520-s003.pdf]

**Supplementary Table 3.** Results of the Target prediction for miR-194-5p using Target Scan v.7.2 and Diana Tool MicroT-CDS v.5.0.

| Target Gene | Cumulative weighted context++ score | Total context++ score | Aggregate PCT | MiTG     | Target Gene | Cumulative weighted context++ score | Total context++ score | Aggregate PCT | MiTG     |
|-------------|-------------------------------------|-----------------------|---------------|----------|-------------|-------------------------------------|-----------------------|---------------|----------|
| TRIM23      | -0.5                                | -0.51                 | 0.32          | 0.981011 | AKT2        | -0.15                               | -0.15                 | 0.53          | 0.773286 |
| TMED5       | -0.49                               | -0.73                 | 0.33          | 0.831892 | ARHGAP24    | -0.15                               | -0.18                 | 0.55          | 0.796644 |
| SLC10A7     | -0.49                               | -0.7                  | 0.14          | 0.920473 | LPHN2       | -0.15                               | -0.15                 | 0.55          | 0.841762 |
| ERGIC2      | -0.46                               | -0.46                 | 0.55          | 0.999352 | ERBB4       | -0.15                               | -0.18                 | 0.55          | 0.903769 |
| TEFM        | -0.45                               | -0.47                 | < 0.1         | 0.982956 | HIAT1       | -0.15                               | -0.2                  | 0.42          | 0.864159 |
| STAT1       | -0.45                               | -0.55                 | < 0.1         | 0.762706 | AMD1        | -0.14                               | -0.32                 | 0.18          | 0.738216 |
| RAP2B       | -0.44                               | -0.73                 | 0.79          | 0.813895 | CAMK2G      | -0.14                               | -0.14                 | 0.55          | 0.835199 |
| MID1IP1     | -0.43                               | -0.43                 | 0.33          | 0.963489 | TRIP12      | -0.14                               | -0.2                  | 0.46          | 0.974147 |
| NUDC        | -0.42                               | -0.52                 | 0.55          | 0.975467 | CHD6        | -0.14                               | -0.14                 | 0.43          | 0.727125 |
| PAIP2       | -0.4                                | -0.4                  | 0.55          | 0.954517 | PSME3       | -0.14                               | -0.14                 | 0.34          | 0.720207 |
| ATP6V1H     | -0.4                                | -0.4                  | 0.2           | 0.715332 | RHEB        | -0.14                               | -0.31                 | 0.55          | 0.855686 |
| SLC7A5      | -0.39                               | -0.42                 | 0.41          | 0.914903 | DNMT3A      | -0.14                               | -0.29                 | 0.79          | 0.938058 |
| SLK         | -0.38                               | -0.39                 | 0.31          | 0.981054 | DAAM1       | -0.14                               | -0.19                 | 0.3           | 0.875616 |
| PTPLB       | -0.37                               | -0.37                 | < 0.1         | 0.816621 | PAFAH1B1    | -0.14                               | -0.15                 | 0.55          | 0.897828 |
| FAM107B     | -0.36                               | -0.65                 | < 0.1         | 0.804205 | SGPP2       | -0.14                               | -0.22                 | < 0.1         | 0.765868 |
| SNAP91      | -0.36                               | -0.36                 | 0.13          | 0.872915 | SYVN1       | -0.13                               | -0.14                 | 0.55          | 0.859452 |
| GRHL3       | -0.35                               | -0.35                 | 0.16          | 0.891536 | ACHE        | -0.13                               | -0.39                 | 0.17          | 0.973065 |
| SLTM        | -0.35                               | -0.36                 | 0.39          | 0.999316 | ELF2        | -0.13                               | -0.13                 | 0.55          | 0.796334 |
| RSBN1L      | -0.35                               | -0.41                 | 0.57          | 0.992971 | OTP         | -0.12                               | -0.12                 | 0.55          | 0.710157 |
| SEPHS1      | -0.33                               | -0.37                 | 0.57          | 0.994116 | LIN28B      | -0.12                               | -0.12                 | < 0.1         | 0.713877 |
| SETD8       | -0.33                               | -0.33                 | 0.49          | 0.899924 | PVRL4       | -0.12                               | -0.12                 | < 0.1         | 0.722846 |
| GOT2        | -0.31                               | -0.43                 | 0.46          | 0.999811 | SETD5       | -0.12                               | -0.2                  | 0.47          | 0.998517 |
| RFX6        | -0.3                                | -0.3                  | 0.27          | 0.943858 | SNX1        | -0.11                               | -0.16                 | 0.69          | 0.781367 |
| DUSP9       | -0.29                               | -0.29                 | 0.44          | 0.733478 | PPARGC1A    | -0.11                               | -0.11                 | 0.55          | 0.811809 |
| DCUN1D5     | -0.29                               | -0.4                  | 0.55          | 0.908211 | OPCML       | -0.11                               | -0.11                 | 0.55          | 0.87958  |
| TSPAN7      | -0.29                               | -0.29                 | < 0.1         | 0.778829 | ARID4A      | -0.11                               | -0.11                 | 0.55          | 0.8312   |
| ARID2       | -0.28                               | -0.28                 | 0.4           | 0.82587  | ITGB6       | -0.11                               | -0.11                 | < 0.1         | 0.838143 |
| ARF4        | -0.28                               | -0.28                 | 0.44          | 0.834818 | BICD2       | -0.1                                | -0.26                 | < 0.1         | 0.933151 |
| RAB6B       | -0.28                               | -0.28                 | 0.64          | 0.953928 | ONCUT2      | -0.1                                | -0.11                 | 0.62          | 0.930996 |
| HNF1B       | -0.28                               | -0.28                 | 0.42          | 0.749551 | SATB1       | -0.1                                | -0.13                 | 0.55          | 0.767405 |
| FBXW7       | -0.27                               | -0.27                 | 0.48          | 0.990766 | ASAP1       | -0.1                                | -0.1                  | 0.39          | 0.990011 |
| PAK2        | -0.27                               | -0.27                 | 0.14          | 0.73961  | CHD8        | -0.1                                | -0.1                  | 0.26          | 0.830213 |
| GMFB        | -0.27                               | -0.29                 | 0.26          | 0.734658 | SLC12A6     | -0.09                               | -0.17                 | 0.51          | 0.857187 |
| KLF7        | -0.26                               | -0.27                 | 0.55          | 0.952678 | MEX3A       | -0.09                               | -0.11                 | 0.28          | 0.787349 |
| ACBD3       | -0.26                               | -0.27                 | < 0.1         | 0.894665 | SEMA6A      | -0.09                               | -0.09                 | 0.54          | 0.714767 |
| ARHGAP21    | -0.26                               | -0.26                 | 0.29          | 0.976948 | HMG20A      | -0.08                               | -0.14                 | 0.35          | 0.799471 |
| DACH1       | -0.26                               | -0.28                 | 0.22          | 0.998087 | PRKD3       | -0.08                               | -0.33                 | 0.55          | 0.894082 |
| LPIN2       | -0.25                               | -0.26                 | 0.55          | 0.891814 | RSBN1       | -0.08                               | -0.08                 | < 0.1         | 0.733451 |
| PHYHIP1L    | -0.25                               | -0.39                 | < 0.1         | 0.840235 | CLCN5       | -0.08                               | -0.16                 | 0.46          | 0.852687 |
| FKBP6       | -0.25                               | -0.25                 | < 0.1         | 0.817262 | MGAT4A      | -0.08                               | -0.17                 | 0.55          | 0.906412 |
| PRSS53      | -0.25                               | -0.25                 | 0.54          | 0.928544 | RFX3        | -0.08                               | -0.26                 | 0.37          | 0.904627 |
| HBEGF       | -0.25                               | -0.66                 | 0.69          | 0.999341 | E2F3        | -0.08                               | -0.08                 | 0.54          | 0.813987 |
| PFN2        | -0.23                               | -0.24                 | 0.55          | 0.882766 | PITPNM2     | -0.08                               | -0.1                  | 0.14          | 0.895725 |
| SGCE        | -0.23                               | -0.23                 | 0.55          | 0.851101 | TNPO1       | -0.07                               | -0.11                 | 0.55          | 0.78671  |
| HNRNPA0     | -0.23                               | -0.23                 | 0.55          | 0.780024 | OTUD4       | -0.07                               | -0.07                 | < 0.1         | 0.847282 |
| EXOC5       | -0.23                               | -0.23                 | 0.46          | 0.751349 | ADAM12      | -0.07                               | -0.08                 | < 0.1         | 0.73022  |
| ELMSAN1     | -0.23                               | -0.23                 | 0.56          | 0.996329 | STAT5B      | -0.07                               | -0.17                 | 0.55          | 0.872417 |
| FMR1        | -0.23                               | -0.34                 | < 0.1         | 0.994802 | PPP3R1      | -0.07                               | -0.16                 | 0.23          | 0.758001 |
| UBE2V2      | -0.22                               | -0.54                 | 0.55          | 0.787566 | SDAD1       | -0.06                               | -0.13                 | 0.55          | 0.772853 |
| VAPA        | -0.22                               | -0.84                 | 0.69          | 0.929783 | FBRS        | -0.06                               | -0.06                 | < 0.1         | 0.899171 |
| FOXA1       | -0.22                               | -0.22                 | 0.36          | 0.816252 | NUCKS1      | -0.06                               | -0.2                  | 0.55          | 0.714046 |
| NRP1        | -0.22                               | -0.27                 | 0.55          | 0.894971 | LSAMP       | -0.06                               | -0.23                 | 0.43          | 0.85762  |
| TLN2        | -0.22                               | -0.22                 | 0.56          | 0.739586 | OSBPL8      | -0.05                               | -0.46                 | 0.47          | 0.87202  |
| SP3         | -0.22                               | -0.22                 | 0.55          | 0.719156 | PTPRD       | -0.05                               | -0.1                  | 0.55          | 0.954903 |
| KCMF1       | -0.21                               | -0.21                 | 0.55          | 0.842746 | PPFIBP1     | -0.05                               | -0.09                 | < 0.1         | 0.845036 |

|          |       |       |       |          |          |       |       |       |          |
|----------|-------|-------|-------|----------|----------|-------|-------|-------|----------|
| EIF4G2   | -0.2  | -0.2  | 0.54  | 0.816995 | TRPS1    | -0.05 | -0.1  | 0.51  | 0.998299 |
| ENOX1    | -0.2  | -0.39 | 0.38  | 0.999234 | JMJD1C   | -0.05 | -0.05 | 0.55  | 0.845181 |
| NETO1    | -0.2  | -0.33 | 0.76  | 0.936017 | ZFHX4    | -0.05 | -0.05 | 0.46  | 0.94843  |
| SALL1    | -0.2  | -0.54 | 0.46  | 0.998889 | RUNX3    | -0.05 | -0.09 | < 0.1 | 0.889468 |
| REV3L    | -0.2  | -0.2  | 0.54  | 0.981759 | CCR10    | -0.05 | -0.36 | 0.4   | 0.743165 |
| TMED9    | -0.2  | -0.4  | 0.55  | 0.944431 | MAP2     | -0.04 | -0.06 | 0.35  | 0.964614 |
| DUSP10   | -0.19 | -0.19 | 0.55  | 0.734887 | NAA50    | -0.04 | -0.32 | 0.57  | 0.979536 |
| KMT2C    | -0.19 | -0.19 | 0.61  | 0.864119 | ITPKB    | -0.04 | -0.04 | 0.38  | 0.982141 |
| DR1      | -0.19 | -0.25 | 0.55  | 0.773841 | DMD      | -0.03 | -0.2  | 0.51  | 0.826378 |
| PPP2R2C  | -0.19 | -0.19 | 0.5   | 0.812456 | CHD1     | -0.03 | -0.17 | 0.49  | 0.901686 |
| SET      | -0.19 | -0.19 | 0.55  | 0.83123  | SOX6     | -0.03 | -0.09 | 0.52  | 0.889379 |
| PRKAR1A  | -0.19 | -0.26 | 0.53  | 0.812713 | SMURF1   | -0.03 | -0.11 | 0.55  | 0.915273 |
| BCLAF1   | -0.19 | -0.34 | 0.55  | 0.881355 | SUFU     | -0.02 | -0.04 | < 0.1 | 0.787976 |
| TTC7B    | -0.18 | -0.3  | 0.33  | 0.735821 | CEP350   | -0.02 | -0.02 | < 0.1 | 0.724434 |
| WAPAL    | -0.18 | -0.22 | 0.33  | 0.9626   | SLC30A10 | -0.02 | -0.12 | 0.55  | 0.875189 |
| MEIS2    | -0.18 | -0.18 | 0.43  | 0.944928 | BIRC6    | -0.02 | -0.03 | < 0.1 | 0.803671 |
| SLC30A1  | -0.18 | -0.2  | 0.2   | 0.870839 | CAPZB    | -0.02 | -0.18 | 0.55  | 0.708462 |
| COL4A3BP | -0.18 | -0.29 | 0.43  | 0.92011  | NFAT5    | -0.02 | -0.04 | 0.53  | 0.913664 |
| CHD4     | -0.18 | -0.18 | 0.43  | 0.889681 | UBR5     | -0.01 | -0.12 | 0.51  | 0.774026 |
| CRK      | -0.18 | -0.18 | < 0.1 | 0.856811 | GIGYF1   | -0.01 | -0.01 | < 0.1 | 0.900373 |
| SDC4     | -0.18 | -0.32 | 0.52  | 0.787513 | PDHB     | -0.01 | -0.27 | 0.64  | 0.721324 |
| PHF21A   | -0.17 | -0.17 | 0.55  | 0.744362 | CADM1    | 0     | -0.24 | 0.9   | 0.972289 |
| CDH2     | -0.17 | -0.17 | 0.55  | 0.796689 | LRRC4C   | 0     | -0.28 | 0.53  | 0.908255 |
| TCF7L2   | -0.17 | -0.17 | 0.55  | 0.761728 | ZBTB20   | 0     | -0.2  | 0.61  | 0.939419 |
| LHX6     | -0.17 | -0.17 | 0.55  | 0.801319 | TSC22D2  | 0     | -0.08 | 0.55  | 0.793327 |
| DHX15    | -0.17 | -0.17 | 0.55  | 0.808113 | NCL      | 0     | -0.27 | 0.54  | 0.707306 |
| CEP170   | -0.17 | -0.17 | 0.14  | 0.945352 | SUMO2    | 0     | -0.53 | 0.57  | 0.999546 |
| NRIP1    | -0.16 | -0.16 | 0.55  | 0.820419 | RABAC1   | 0     | -0.76 | 0.22  | 0.961871 |
| MEF2C    | -0.16 | -0.27 | 0.55  | 0.741349 | UBE2D3   | 0     | -0.3  | < 0.1 | 0.913441 |
| ENAH     | -0.16 | -0.18 | 0.55  | 0.863833 |          |       |       |       |          |
