# Supplementary material for: Downregulation of circulating miR 802‐5p and miR 194‐5p and upregulation of brain MEF2C along breast cancer brain metastasization
Source: PubMed Central journal article supplement (PMC7053247; doi:10.1002/1878-0261.12632), 2020-02-05
Supplement: MOL2-14-520-s004.pdf [file MOL2-14-520-s004.pdf]

**Supplementary Table 4.** Results of the target prediction for miR-802-5p using TargetScan v.7.2 and Diana tools MicroT-CDS v.5.0.

| Target Gene | Cumulative weighted context++ score | Total context++ score | Aggregate PCT | MiTG     | Target Gene | Cumulative weighted context++ score | Total context++ score | Aggregate PCT | MiTG     |
|-------------|-------------------------------------|-----------------------|---------------|----------|-------------|-------------------------------------|-----------------------|---------------|----------|
| TMED9       | -0.95                               | -0.96                 | 0.7           | 0.999909 | ZMYM2       | -0.13                               | -0.2                  | < 0.1         | 0.952878 |
| SREK1       | -0.66                               | -0.76                 | 0.42          | 0.985192 | FAT1        | -0.12                               | -0.15                 | 0.7           | 0.981068 |
| FOXJ3       | -0.55                               | -0.55                 | 0.56          | 0.901663 | MBNL1       | -0.12                               | -0.12                 | 0.39          | 0.801453 |
| KHDRBS1     | -0.52                               | -0.52                 | 0.32          | 0.999481 | LIN54       | -0.12                               | -0.12                 | < 0.1         | 0.782849 |
| PSMD2       | -0.52                               | -0.52                 | < 0.1         | 0.991373 | CDV3        | -0.12                               | -0.15                 | 0.39          | 0.766561 |
| SCAMP1      | -0.47                               | -0.48                 | 0.48          | 0.932605 | DSCAM       | -0.11                               | -0.11                 | 0.57          | 0.934438 |
| HSPD1       | -0.45                               | -0.45                 | 0.56          | 0.875645 | EVI5        | -0.11                               | -0.11                 | 0.55          | 0.775588 |
| SLC2A3      | -0.44                               | -0.44                 | 0.3           | 0.891992 | MEX3B       | -0.11                               | -0.11                 | 0.43          | 0.781921 |
| MSI1        | -0.43                               | -0.43                 | 0.67          | 0.856616 | HAPLN1      | -0.11                               | -0.11                 | 0.51          | 0.781952 |
| SCG2        | -0.43                               | -0.43                 | 0.43          | 0.972459 | GABPA       | -0.1                                | -0.1                  | 0.34          | 0.815857 |
| HNF1B       | -0.42                               | -0.42                 | 0.16          | 0.999886 | DEPDC1B     | -0.09                               | -0.1                  | 0.28          | 0.755464 |
| XKRX        | -0.41                               | -0.41                 | < 0.1         | 0.838433 | ZFYVE9      | -0.09                               | -0.22                 | 0.55          | 0.78931  |
| DDX4        | -0.39                               | -0.39                 | 0.24          | 0.791042 | PRICKLE2    | -0.09                               | -0.09                 | 0.51          | 0.865375 |
| SMTNL2      | -0.38                               | -0.38                 | 0.35          | 0.887651 | SLC9A6      | -0.09                               | -0.09                 | 0.13          | 0.742503 |
| RHOA        | -0.38                               | -0.38                 | 0.34          | 0.817546 | NR3C2       | -0.09                               | -0.09                 | 0.32          | 0.70552  |
| RAN         | -0.37                               | -0.43                 | 0.55          | 0.922937 | GNA13       | -0.09                               | -0.12                 | 0.54          | 0.854533 |
| RAPGEF4     | -0.37                               | -0.37                 | 0.26          | 0.984161 | ZMYND11     | -0.08                               | -0.1                  | 0.36          | 0.785629 |
| ARID2       | -0.36                               | -0.36                 | 0.45          | 0.999041 | YWHAE       | -0.08                               | -0.09                 | 0.49          | 0.927791 |
| SDC4        | -0.34                               | -0.56                 | 0.48          | 0.981052 | CLCN3       | -0.08                               | -0.09                 | 0.51          | 0.743844 |
| UBE2M       | -0.33                               | -0.33                 | 0.22          | 0.913111 | JMJD1C      | -0.08                               | -0.1                  | 0.46          | 0.753716 |
| NKRF        | -0.32                               | -0.33                 | 0.53          | 0.792197 | PANK1       | -0.08                               | -0.14                 | 0.56          | 0.701887 |
| PAFAH1B1    | -0.32                               | -0.45                 | 0.25          | 0.737278 | MYLIP       | -0.07                               | -0.08                 | 0.43          | 0.797326 |
| CDH11       | -0.3                                | -0.45                 | 0.55          | 0.858018 | PNPLA8      | -0.07                               | -0.14                 | 0.35          | 0.753913 |
| KLF7        | -0.29                               | -0.3                  | 0.56          | 0.995724 | CACNA1I     | -0.07                               | -0.07                 | 0.55          | 0.757567 |
| SLC35F1     | -0.29                               | -0.29                 | 0.13          | 0.907496 | DCUN1D3     | -0.07                               | -0.07                 | 0.53          | 0.77476  |
| CSDE1       | -0.28                               | -0.28                 | 0.57          | 0.986691 | EPM2AIP1    | -0.07                               | -0.17                 | 0.36          | 0.816662 |
| CDK19       | -0.27                               | -0.37                 | 0.23          | 0.841852 | PEAK1       | -0.07                               | -0.08                 | 0.53          | 0.70174  |
| MBNL2       | -0.27                               | -0.27                 | < 0.1         | 0.965317 | SLC33A1     | -0.07                               | -0.15                 | 0.37          | 0.750557 |
| MIER3       | -0.26                               | -0.3                  | 0.36          | 0.82333  | EDEM3       | -0.07                               | -0.07                 | 0.37          | 0.75158  |
| STX16       | -0.25                               | -0.35                 | 0.24          | 0.96191  | HECW2       | -0.06                               | -0.09                 | 0.32          | 0.863959 |
| TBC1D23     | -0.25                               | -0.27                 | 0.23          | 0.951752 | ONECUT2     | -0.05                               | -0.05                 | 0.33          | 0.707787 |
| TMEM25      | -0.24                               | -0.24                 | 0.18          | 0.703531 | ATXN1       | -0.05                               | -0.06                 | 0.47          | 0.818501 |
| GATA4       | -0.23                               | -0.23                 | < 0.1         | 0.876993 | ABAT        | -0.04                               | -0.09                 | 0.55          | 0.809815 |
| AGFG1       | -0.23                               | -0.23                 | 0.56          | 0.897033 | FZD5        | -0.04                               | -0.25                 | 0.54          | 0.834818 |
| PPP3CA      | -0.22                               | -0.22                 | 0.38          | 0.934698 | RAPGEF6     | -0.04                               | -0.04                 | 0.54          | 0.839526 |
| ATP6V1C1    | -0.22                               | -0.23                 | 0.2           | 0.786791 | NDUFB6      | -0.03                               | -0.28                 | 0.42          | 0.882873 |
| TSHZ3       | -0.21                               | -0.21                 | 0.41          | 0.939905 | MAP3K2      | -0.03                               | -0.18                 | 0.17          | 0.903692 |
| SLC2A1      | -0.2                                | -0.2                  | 0.39          | 0.755085 | MEF2C       | -0.03                               | -0.09                 | 0.71          | 0.952272 |
| USP44       | -0.19                               | -0.19                 | ORF           | 0.735664 | TET3        | -0.03                               | -0.03                 | 0.2           | 0.732387 |
| MATR3       | -0.19                               | -0.28                 | 0.21          | 0.9436   | ASAP1       | -0.03                               | -0.03                 | < 0.1         | 0.869298 |
| TRAF3       | -0.18                               | -0.24                 | 0.42          | 0.722446 | KMT2A       | -0.03                               | -0.03                 | 0.27          | 0.875507 |
| TCF4        | -0.18                               | -0.22                 | 0.19          | 0.975189 | PPP2CA      | -0.03                               | -0.63                 | 0.56          | 0.949455 |
| CPEB3       | -0.18                               | -0.18                 | 0.43          | 0.824353 | ATF2        | -0.03                               | -0.03                 | < 0.1         | 0.986103 |
| SOX6        | -0.17                               | -0.32                 | 0.41          | 0.927457 | NSD1        | -0.03                               | -0.09                 | 0.44          | 0.852003 |
| RORA        | -0.16                               | -0.19                 | 0.33          | 0.816545 | KDM5A       | -0.02                               | -0.03                 | 0.38          | 0.723192 |
| PCSK5       | -0.16                               | -0.16                 | 0.4           | 0.840574 | MYO6        | -0.02                               | -0.18                 | 0.13          | 0.742437 |
| LRRTM3      | -0.16                               | -0.16                 | 0.53          | 0.978788 | HIPK1       | -0.02                               | -0.02                 | 0.58          | 0.922359 |
| SLC25A53    | -0.16                               | -0.33                 | < 0.1         | 0.801373 | SMARCE1     | -0.02                               | -0.11                 | 0.47          | 0.802616 |
| ZFHX4       | -0.15                               | -0.16                 | 0.49          | 0.997019 | BRD3        | -0.02                               | -0.23                 | 0.17          | 0.994458 |
| IQSEC1      | -0.15                               | -0.25                 | 0.54          | 0.745638 | MED13       | -0.02                               | -0.08                 | < 0.1         | 0.960335 |
| SOAT1       | -0.15                               | -0.15                 | 0.23          | 0.740805 | PIP4K2B     | -0.01                               | -0.23                 | 0.54          | 0.887162 |
| HIAT1       | -0.15                               | -0.28                 | 0.55          | 0.841361 | ERMP1       | -0.01                               | -0.23                 | 0.16          | 0.774486 |
| ARMC8       | -0.15                               | -0.15                 | 0.45          | 0.74319  | UFD1L       | -0.01                               | -0.28                 | 0.55          | 0.717176 |
| NEGR1       | -0.14                               | -0.17                 | 0.37          | 0.813117 | DCTN4       | -0.01                               | -0.21                 | 0.26          | 0.757104 |
| TAB3        | -0.14                               | -0.15                 | 0.19          | 0.780968 | FOXP1       | -0.01                               | -0.08                 | 0.47          | 0.903238 |
| TOB1        | -0.14                               | -0.14                 | 0.48          | 0.895328 | ARHGEF12    | 0                                   | -0.01                 | 0.55          | 0.915539 |

|       |       |       |      |          |      |   |       |      |          |
|-------|-------|-------|------|----------|------|---|-------|------|----------|
| ZFHX3 | -0.14 | -0.18 | 0.47 | 0.993017 | IMMT | 0 | -0.08 | 0.55 | 0.734088 |
| NMT2  | -0.13 | -0.39 | 0.55 | 0.997604 | TLK2 | 0 | -0.13 | 0.12 | 0.847124 |
| SETD2 | -0.13 | -0.14 | 0.45 | 0.924397 | NFIB | 0 | -0.16 | 0.49 | 0.991528 |

ORF, Open Reading Frame
