# Supplementary material for: Downregulation of circulating miR 802‐5p and miR 194‐5p and upregulation of brain MEF2C along breast cancer brain metastasization
Source: PubMed Central journal article supplement (PMC7053247; doi:10.1002/1878-0261.12632), 2020-02-05
Supplement: MOL2-14-520-s005.pdf [file MOL2-14-520-s005.pdf]

**Supplementary Table 5.** Results of the target prediction for miR-17-3p using TargetScan v.7.2 and Diana Tools MicroT-CDS v.5.0.

| Target Gene | Cumulative weighted context++ score | Total context++ score | Aggregate PCT | MiTG      | Target Gene | Cumulative weighted context++ score | Total context++ score | Aggregate PCT | MiTG      |
|-------------|-------------------------------------|-----------------------|---------------|-----------|-------------|-------------------------------------|-----------------------|---------------|-----------|
| YIPF5       | -0.69                               | -0.69                 | N/A           | 0.8639967 | KCND3       | -0.12                               | -0.12                 | N/A           | 0.8582322 |
| GREB1L      | -0.68                               | -0.68                 | N/A           | 0.7341568 | CTNND1      | -0.12                               | -0.29                 | N/A           | 0.9718884 |
| BBX         | -0.63                               | -0.67                 | N/A           | 0.9247143 | CACNA1D     | -0.12                               | -0.12                 | N/A           | 0.7238547 |
| LYVE1       | -0.62                               | -0.86                 | N/A           | 0.7751044 | FRK         | -0.12                               | -0.26                 | N/A           | 0.7194361 |
| GYPC        | -0.61                               | -0.61                 | N/A           | 0.9633201 | CYTH1       | -0.12                               | -0.12                 | N/A           | 0.7684528 |
| RECQL4      | -0.61                               | -0.61                 | N/A           | 0.7522649 | RORA        | -0.12                               | -0.14                 | N/A           | 0.7170271 |
| SMARCA5     | -0.55                               | -0.66                 | N/A           | 0.7654935 | BRWD3       | -0.12                               | -0.15                 | N/A           | 0.9109003 |
| TSC1        | -0.54                               | -0.6                  | N/A           | 0.8136672 | SORCS2      | -0.11                               | -0.15                 | N/A           | 0.7746416 |
| NEUROG1     | -0.54                               | -0.54                 | N/A           | 0.7918253 | DACH1       | -0.11                               | -0.11                 | N/A           | 0.7437861 |
| SLC40A1     | -0.52                               | -0.65                 | N/A           | 0.7977602 | VSIG10      | -0.11                               | -0.33                 | N/A           | 0.7185098 |
| ATF1        | -0.5                                | -0.59                 | N/A           | 0.7132483 | STOX2       | -0.11                               | -0.12                 | N/A           | 0.8190927 |
| ATG10       | -0.48                               | -0.61                 | N/A           | 0.775864  | KIF5C       | -0.11                               | -0.25                 | N/A           | 0.9364542 |
| PPP2CA      | -0.48                               | -0.48                 | N/A           | 0.8782823 | PCDHA10     | -0.11                               | -0.11                 | N/A           | 0.7241824 |
| RAP2A       | -0.47                               | -0.49                 | N/A           | 0.7715476 | KCNA1       | -0.11                               | -0.11                 | N/A           | 0.8038043 |
| VPS36       | -0.44                               | -0.46                 | N/A           | 0.8148425 | LRRC14      | -0.11                               | -0.13                 | N/A           | 0.7518062 |
| RIT1        | -0.43                               | -0.55                 | N/A           | 0.7565781 | CHD7        | -0.11                               | -0.12                 | N/A           | 0.7767347 |
| WIBG        | -0.42                               | -0.42                 | N/A           | 0.7737177 | PTPN2       | -0.11                               | -0.18                 | N/A           | 0.7482413 |
| SMEK1       | -0.41                               | -0.41                 | N/A           | 0.974589  | COPS2       | -0.11                               | -0.11                 | N/A           | 0.7320244 |
| NRF1        | -0.4                                | -0.4                  | N/A           | 0.7572689 | ARID4A      | -0.11                               | -0.11                 | N/A           | 0.7611902 |
| ELTD1       | -0.4                                | -0.4                  | N/A           | 0.7401522 | PSD3        | -0.11                               | -0.12                 | N/A           | 0.7071386 |
| EBF1        | -0.39                               | -0.39                 | N/A           | 0.9139082 | BTF3        | -0.11                               | -0.26                 | N/A           | 0.7688861 |
| RAB21       | -0.39                               | -0.39                 | N/A           | 0.9853384 | KBTBD2      | -0.11                               | -0.11                 | N/A           | 0.7413645 |
| OBSCN       | -0.38                               | -0.38                 | N/A           | 0.7413025 | ZFHX2       | -0.1                                | -0.1                  | N/A           | 0.9025715 |
| RAP2C       | -0.38                               | -0.53                 | N/A           | 0.9682747 | LPIN2       | -0.1                                | -0.1                  | N/A           | 0.7396211 |
| FAM169A     | -0.37                               | -0.4                  | N/A           | 0.8879096 | PLEKHG4     | -0.1                                | -0.1                  | N/A           | 0.7570234 |
| RAB8B       | -0.35                               | -0.36                 | N/A           | 0.9671688 | COL12A1     | -0.1                                | -0.56                 | N/A           | 0.9932888 |
| IPO5        | -0.34                               | -0.4                  | N/A           | 0.8010351 | IMPDH1      | -0.1                                | -0.1                  | N/A           | 0.7048521 |
| SMIM14      | -0.34                               | -0.43                 | N/A           | 0.9275585 | SPRED2      | -0.1                                | -0.11                 | N/A           | 0.8108673 |
| PPP6R1      | -0.34                               | -0.41                 | N/A           | 0.7903077 | KRAS        | -0.1                                | -0.29                 | N/A           | 0.843668  |
| USP46       | -0.34                               | -0.38                 | N/A           | 0.8400438 | GALNTL6     | -0.1                                | -0.1                  | N/A           | 0.7798187 |
| MLXIP       | -0.34                               | -0.41                 | N/A           | 0.7709477 | CAPN7       | -0.09                               | -0.45                 | N/A           | 0.8712637 |
| ERGIC2      | -0.34                               | -0.37                 | N/A           | 0.7976461 | TAB1        | -0.09                               | -0.1                  | N/A           | 0.7096626 |
| MED13L      | -0.34                               | -0.51                 | N/A           | 0.9051891 | PELI2       | -0.09                               | -0.11                 | N/A           | 0.7375602 |
| PPM1F       | -0.33                               | -0.36                 | N/A           | 0.743312  | AGFG1       | -0.09                               | -0.1                  | N/A           | 0.7125768 |
| YY2         | -0.32                               | -0.32                 | N/A           | 0.7481928 | RCOR1       | -0.09                               | -0.14                 | N/A           | 0.7636254 |
| EYA3        | -0.31                               | -0.31                 | N/A           | 0.8353457 | SOX11       | -0.09                               | -0.09                 | N/A           | 0.7813589 |
| FGFR1OP     | -0.31                               | -0.59                 | N/A           | 0.9122515 | SRSF10      | -0.09                               | -0.1                  | N/A           | 0.8544207 |
| TES         | -0.3                                | -0.3                  | N/A           | 0.8357008 | TNRC6B      | -0.09                               | -0.11                 | N/A           | 0.7632446 |
| HP1BP3      | -0.3                                | -0.32                 | N/A           | 0.719626  | POU6F1      | -0.09                               | -0.09                 | N/A           | 0.7309603 |
| AP2A2       | -0.3                                | -0.31                 | N/A           | 0.7513344 | DPYSL2      | -0.08                               | -0.08                 | N/A           | 0.8330467 |
| ARHGEF40    | -0.3                                | -0.32                 | N/A           | 0.7442224 | SMURF1      | -0.08                               | -0.35                 | N/A           | 0.7056469 |
| FAM45A      | -0.3                                | -0.3                  | N/A           | 0.7029161 | TBC1D30     | -0.08                               | -0.41                 | N/A           | 0.7948308 |
| AGO4        | -0.29                               | -0.37                 | N/A           | 0.7657916 | RREB1       | -0.08                               | -0.08                 | N/A           | 0.7292753 |
| THSD4       | -0.29                               | -0.46                 | N/A           | 0.8286226 | ZFR         | -0.08                               | -0.18                 | N/A           | 0.7391855 |
| APAF1       | -0.29                               | -0.29                 | N/A           | 0.847014  | DCLK1       | -0.08                               | -0.17                 | N/A           | 0.823037  |
| GABPB2      | -0.29                               | -0.38                 | N/A           | 0.7665388 | JARID2      | -0.08                               | -0.08                 | N/A           | 0.891243  |
| FKBP5       | -0.28                               | -0.28                 | N/A           | 0.7943886 | BAI1        | -0.08                               | -0.08                 | N/A           | 0.7712396 |
| SLC35B2     | -0.28                               | -0.28                 | N/A           | 0.7278006 | RC3H1       | -0.08                               | -0.1                  | N/A           | 0.7541873 |
| STXBP1      | -0.28                               | -0.39                 | N/A           | 0.724675  | CBLL1       | -0.08                               | -0.17                 | N/A           | 0.7015517 |
| TDRKH       | -0.28                               | -0.29                 | N/A           | 0.7896945 | POU2F1      | -0.08                               | -0.08                 | N/A           | 0.8009264 |
| AGGF1       | -0.28                               | -0.29                 | N/A           | 0.8552118 | FAF1        | -0.08                               | -0.18                 | N/A           | 0.8756497 |
| NAMPT       | -0.28                               | -0.29                 | N/A           | 0.742962  | TAB2        | -0.07                               | -0.07                 | N/A           | 0.7021732 |
| TNP2        | -0.27                               | -0.27                 | N/A           | 0.7715569 | SMG6        | -0.07                               | -0.07                 | N/A           | 0.9076736 |
| CDCP1       | -0.27                               | -0.36                 | N/A           | 0.7315804 | TMX4        | -0.07                               | -0.1                  | N/A           | 0.845652  |
| GKAP1       | -0.27                               | -0.27                 | N/A           | 0.8668482 | ZNRF2       | -0.07                               | -0.35                 | N/A           | 0.7995211 |
| PIGT        | -0.27                               | -0.27                 | N/A           | 0.7359581 | GPBP1       | -0.07                               | -0.18                 | N/A           | 0.9068783 |
| OSBPL5      | -0.27                               | -0.27                 | N/A           | 0.7078302 | FAM219B     | -0.07                               | -0.08                 | N/A           | 0.7033691 |

|          |       |       |     |           |          |       |       |     |           |
|----------|-------|-------|-----|-----------|----------|-------|-------|-----|-----------|
| MACROD2  | -0.26 | -0.26 | N/A | 0.921538  | CAMSAP1  | -0.06 | -0.1  | N/A | 0.7673285 |
| PPARGC1A | -0.26 | -0.36 | N/A | 0.9174552 | TEAD1    | -0.06 | -0.06 | N/A | 0.7477532 |
| TSHZ3    | -0.25 | -0.3  | N/A | 0.7732079 | LRFN1    | -0.06 | -0.06 | N/A | 0.755691  |
| PDE7A    | -0.25 | -0.76 | N/A | 0.80876   | CREBL2   | -0.06 | -0.24 | N/A | 0.724639  |
| RAP1GAP2 | -0.24 | -0.26 | N/A | 0.7157019 | RBMS3    | -0.06 | -0.1  | N/A | 0.7094809 |
| AEBP2    | -0.24 | -0.24 | N/A | 0.8395793 | EML5     | -0.06 | -0.07 | N/A | 0.7319119 |
| DCHS1    | -0.24 | -0.24 | N/A | 0.9728169 | TMOD1    | -0.06 | -0.15 | N/A | 0.7035133 |
| B3GAT2   | -0.24 | -0.25 | N/A | 0.7756316 | ARMC8    | -0.06 | -0.06 | N/A | 0.8213741 |
| RAD52    | -0.23 | -0.23 | N/A | 0.7541637 | AGO3     | -0.05 | -0.2  | N/A | 0.8588968 |
| GTF2H1   | -0.23 | -0.27 | N/A | 0.7152589 | SGIP1    | -0.05 | -0.1  | N/A | 0.7728853 |
| MBNL1    | -0.23 | -0.24 | N/A | 0.9296103 | MAML1    | -0.05 | -0.05 | N/A | 0.7258857 |
| CALU     | -0.23 | -0.32 | N/A | 0.7426807 | CSDE1    | -0.05 | -0.05 | N/A | 0.9278072 |
| YWHAG    | -0.23 | -0.23 | N/A | 0.9609502 | IMP2     | -0.05 | -0.05 | N/A | 0.8558744 |
| KAT7     | -0.22 | -0.23 | N/A | 0.7890975 | HOMEZ    | -0.05 | -0.13 | N/A | 0.7693477 |
| SYNCRIP  | -0.22 | -0.25 | N/A | 0.9923945 | RBM46    | -0.04 | -0.11 | N/A | 0.7221442 |
| RAB6A    | -0.22 | -0.22 | N/A | 0.8262028 | IL1R1    | -0.04 | -0.04 | N/A | 0.7099776 |
| CAMK2B   | -0.21 | -0.21 | N/A | 0.7154958 | TBCEL    | -0.04 | -0.07 | N/A | 0.8736542 |
| MARCKS   | -0.21 | -0.22 | N/A | 0.7169878 | GFPT1    | -0.04 | -0.05 | N/A | 0.7592268 |
| RAB11A   | -0.21 | -0.38 | N/A | 0.7902463 | MAP9     | -0.04 | -0.16 | N/A | 0.790203  |
| SMG7     | -0.21 | -0.27 | N/A | 0.7835293 | RALGAPA2 | -0.04 | -0.04 | N/A | 0.7473901 |
| PTPRZ1   | -0.21 | -0.21 | N/A | 0.7423449 | MGAT4A   | -0.04 | -0.22 | N/A | 0.9033762 |
| PSIP1    | -0.2  | -0.21 | N/A | 0.7606127 | NFAT5    | -0.03 | -0.06 | N/A | 0.9814471 |
| BCORL1   | -0.2  | -0.2  | N/A | 0.7692001 | LHX9     | -0.03 | -0.04 | N/A | 0.8410458 |
| RPL22    | -0.2  | -0.2  | N/A | 0.7291515 | SLK      | -0.03 | -0.05 | N/A | 0.7440095 |
| VASH2    | -0.2  | -0.2  | N/A | 0.7234781 | PUM2     | -0.03 | -0.08 | N/A | 0.9319397 |
| RHOT1    | -0.2  | -0.2  | N/A | 0.8910875 | SETD5    | -0.03 | -0.13 | N/A | 0.8279016 |
| HMGA2    | -0.2  | -0.2  | N/A | 0.7020276 | TCEB1    | -0.03 | -0.27 | N/A | 0.8822742 |
| MAPK10   | -0.2  | -0.2  | N/A | 0.7611201 | GMPS     | -0.03 | -0.03 | N/A | 0.7838124 |
| CTR9     | -0.2  | -0.2  | N/A | 0.8015285 | PLXNA4   | -0.03 | -0.04 | N/A | 0.8199791 |
| B3GNT5   | -0.19 | -0.19 | N/A | 0.8102692 | WIPF2    | -0.03 | -0.11 | N/A | 0.7495976 |
| MISP     | -0.19 | -0.19 | N/A | 0.7168311 | GAREM    | -0.03 | -0.04 | N/A | 0.7308396 |
| KANSL3   | -0.19 | -0.19 | N/A | 0.757107  | REST     | -0.03 | -0.13 | N/A | 0.7692951 |
| TSHZ1    | -0.18 | -0.19 | N/A | 0.9040266 | SMCR8    | -0.03 | -0.03 | N/A | 0.7003351 |
| FAM188B  | -0.18 | -0.18 | N/A | 0.7799816 | SLC24A4  | -0.03 | -0.14 | N/A | 0.7116228 |
| TSTD2    | -0.18 | -0.18 | N/A | 0.7041387 | IKBKG    | -0.03 | -0.03 | N/A | 0.7392743 |
| RMND5A   | -0.18 | -0.24 | N/A | 0.7751476 | RASAL2   | -0.03 | -0.06 | N/A | 0.8417864 |
| RPTOR    | -0.18 | -0.26 | N/A | 0.7823752 | TANC2    | -0.03 | -0.03 | N/A | 0.733032  |
| YWHAQ    | -0.18 | -0.18 | N/A | 0.8980721 | TFDP2    | -0.03 | -0.16 | N/A | 0.7591272 |
| SYNJ1    | -0.17 | -0.19 | N/A | 0.9178583 | BTRC     | -0.03 | -0.09 | N/A | 0.809649  |
| ITGB8    | -0.17 | -0.24 | N/A | 0.8402185 | FAM129A  | -0.02 | -0.12 | N/A | 0.7521037 |
| RNF111   | -0.17 | -0.19 | N/A | 0.9232311 | CBLB     | -0.02 | -0.12 | N/A | 0.7158528 |
| CDK17    | -0.17 | -0.17 | N/A | 0.8356761 | UNC80    | -0.02 | -0.02 | N/A | 0.7612192 |
| PICALM   | -0.17 | -0.17 | N/A | 0.7723705 | SOD2     | -0.02 | -0.48 | N/A | 0.8354911 |
| TENM1    | -0.17 | -0.17 | N/A | 0.7545008 | HIPK3    | -0.02 | -0.02 | N/A | 0.7631568 |
| USP9X    | -0.16 | -0.22 | N/A | 0.9207345 | MDGA1    | -0.02 | -0.02 | N/A | 0.7100004 |
| EPC2     | -0.16 | -0.21 | N/A | 0.9229993 | OTUD7B   | -0.02 | -0.16 | N/A | 0.731045  |
| TUFT1    | -0.16 | -0.16 | N/A | 0.8137373 | SLC31A1  | -0.02 | -0.17 | N/A | 0.7307939 |
| CELF1    | -0.16 | -0.3  | N/A | 0.7177978 | PTPN4    | -0.02 | -0.11 | N/A | 0.757717  |
| DDI2     | -0.16 | -0.4  | N/A | 0.7438274 | VGLL4    | -0.02 | -0.14 | N/A | 0.8534877 |
| CCP110   | -0.16 | -0.17 | N/A | 0.7457681 | FAR2     | -0.02 | -0.02 | N/A | 0.7663866 |
| VEZF1    | -0.16 | -0.37 | N/A | 0.9733734 | MECP2    | -0.02 | -0.1  | N/A | 0.7198737 |
| ATF2     | -0.16 | -0.24 | N/A | 0.8141578 | HNRNPA3  | -0.02 | -0.18 | N/A | 0.9380573 |
| SHISA9   | -0.16 | -0.16 | N/A | 0.9137113 | DOT1L    | -0.02 | -0.02 | N/A | 0.7299091 |
| TTLL12   | -0.16 | -0.39 | N/A | 0.8916218 | TRAF6    | -0.02 | -0.08 | N/A | 0.7232861 |
| CTNNB1   | -0.16 | -0.16 | N/A | 0.8103862 | SGPL1    | -0.02 | -0.16 | N/A | 0.7663172 |
| ANKRD50  | -0.16 | -0.17 | N/A | 0.8979081 | HDAC5    | -0.02 | -0.1  | N/A | 0.8508511 |
| CENPF    | -0.16 | -0.34 | N/A | 0.8356583 | TIA1     | -0.01 | -0.04 | N/A | 0.718981  |
| TRIM39   | -0.16 | -0.16 | N/A | 0.7548404 | KPNA4    | -0.01 | -0.02 | N/A | 0.7790231 |
| PRRT2    | -0.15 | -0.15 | N/A | 0.7112107 | STRBP    | -0.01 | -0.13 | N/A | 0.7869967 |
| UBL3     | -0.15 | -0.16 | N/A | 0.7474652 | HNRNPR   | -0.01 | -0.28 | N/A | 0.7999043 |
| SCYL2    | -0.15 | -0.26 | N/A | 0.7317213 | IVNS1ABP | -0.01 | -0.11 | N/A | 0.8481355 |
| UHMK1    | -0.15 | -0.19 | N/A | 0.85175   | CREBRF   | -0.01 | -0.03 | N/A | 0.8240566 |
| GOPC     | -0.15 | -0.17 | N/A | 0.7385807 | SLC35E3  | -0.01 | -0.3  | N/A | 0.7299878 |
| IGSF3    | -0.15 | -0.24 | N/A | 0.7732636 | ANK1     | -0.01 | -0.01 | N/A | 0.8547282 |

|          |       |       |     |           |         |       |       |     |           |
|----------|-------|-------|-----|-----------|---------|-------|-------|-----|-----------|
| FZD4     | -0.15 | -0.15 | N/A | 0.7488218 | EIF5B   | -0.01 | -0.06 | N/A | 0.8528483 |
| MORC3    | -0.15 | -0.46 | N/A | 0.7188805 | CHRNA5  | -0.01 | -0.33 | N/A | 0.8558319 |
| CTBP2    | -0.15 | -0.15 | N/A | 0.8282033 | TNRC6C  | -0.01 | -0.14 | N/A | 0.8402122 |
| DDX6     | -0.15 | -0.17 | N/A | 0.7822349 | SOCS7   | -0.01 | -0.06 | N/A | 0.9248643 |
| TIAM2    | -0.14 | -0.14 | N/A | 0.750022  | RTN4RL1 | -0.01 | -0.04 | N/A | 0.7608192 |
| MKLN1    | -0.14 | -0.22 | N/A | 0.9384952 | PLA2G16 | 0     | -0.33 | N/A | 0.7162561 |
| SCRN3    | -0.14 | -0.18 | N/A | 0.7823007 | CASK    | 0     | -0.27 | N/A | 0.7049347 |
| ZFHX4    | -0.14 | -0.14 | N/A | 0.9673644 | VEZT    | 0     | -0.33 | N/A | 0.7882631 |
| SEMA3D   | -0.14 | -0.17 | N/A | 0.8522822 | CCSER2  | 0     | -0.02 | N/A | 0.7121685 |
| RAVER2   | -0.14 | -0.18 | N/A | 0.7036183 | CCDC171 | 0     | -0.03 | N/A | 0.7822345 |
| AAK1     | -0.14 | -0.27 | N/A | 0.7286299 | RPL10L  | 0     | -0.61 | N/A | 0.9360822 |
| ARHGEF38 | -0.14 | -0.14 | N/A | 0.7517767 | MAP4K2  | 0     | -0.13 | N/A | 0.8542458 |
| TMEM245  | -0.13 | -0.14 | N/A | 0.8749779 | KMT2E   | 0     | -0.03 | N/A | 0.8421474 |
| CHST11   | -0.13 | -0.16 | N/A | 0.7320669 | TIMD4   | 0     | -0.16 | N/A | 0.7098387 |
| KPNA3    | -0.13 | -0.17 | N/A | 0.8535817 | ZBTB20  | 0     | -0.09 | N/A | 0.8288886 |
| PTEN     | -0.13 | -0.17 | N/A | 0.7372004 | TG      | 0     | -0.09 | N/A | 0.9766646 |
| SNX27    | -0.13 | -0.13 | N/A | 0.971913  | PHIP    | 0     | -0.02 | N/A | 0.7472064 |
| AP3M1    | -0.13 | -0.13 | N/A | 0.8333553 | BST1    | 0     | -0.35 | N/A | 0.7548686 |
| MEIS1    | -0.13 | -0.13 | N/A | 0.8291042 | CCDC132 | 0     | -0.12 | N/A | 0.8849029 |
| ABCC1    | -0.12 | -0.12 | N/A | 0.8034424 |         |       |       |     |           |

N/A, Not Applicable
