# Supplementary material for: Downregulation of circulating miR 802‐5p and miR 194‐5p and upregulation of brain MEF2C along breast cancer brain metastasization
Source: PubMed Central journal article supplement (PMC7053247; doi:10.1002/1878-0261.12632), 2020-02-05
Supplement: MOL2-14-520-s006.pdf [file MOL2-14-520-s006.pdf]

**Supplementary Table 6.** Results of the target prediction for miR-145-5p using TargetScan v.7.2. and Diana Tools MicroT-CDS v.5.0.

| Target Gene | Cumulative weighted context++ score | Total context++ score | Aggregate PCT | MiTG     | Target Gene | Cumulative weighted context++ score | Total context++ score | Aggregate PCT | MiTG     |
|-------------|-------------------------------------|-----------------------|---------------|----------|-------------|-------------------------------------|-----------------------|---------------|----------|
| FSCN1       | -1.19                               | -1.21                 | > 0.99        | 0.990026 | SMCR8       | -0.19                               | -0.2                  | 0.35          | 0.841142 |
| ABRACL      | -0.9                                | -0.91                 | 0.69          | 0.989389 | RBPMS       | -0.19                               | -0.19                 | 0.61          | 0.914387 |
| FLI1        | -0.89                               | -0.89                 | > 0.99        | 0.999025 | MPZL1       | -0.19                               | -0.19                 | 0.71          | 0.703166 |
| SMCP        | -0.69                               | -0.69                 | 0.42          | 0.723234 | ARPC5       | -0.19                               | -0.22                 | 0.55          | 0.726186 |
| GLIS1       | -0.67                               | -0.67                 | 0.89          | 0.990084 | KLHDC10     | -0.18                               | -0.18                 | 0.68          | 0.704933 |
| FKBP3       | -0.62                               | -0.62                 | 0.59          | 0.719159 | FOXO1       | -0.18                               | -0.18                 | 0.58          | 0.700853 |
| YTHDF2      | -0.56                               | -0.56                 | 0.7           | 0.972194 | MAPK4       | -0.18                               | -0.2                  | < 0.1         | 0.707789 |
| PPP3CA      | -0.56                               | -0.56                 | 0.92          | 0.977589 | PHACTR2     | -0.18                               | -0.21                 | 0.76          | 0.953756 |
| KCNA4       | -0.56                               | -0.56                 | 0.6           | 0.913587 | NFE2L1      | -0.17                               | -0.17                 | 0.79          | 0.878556 |
| MYO5A       | -0.53                               | -0.6                  | 0.96          | 0.934889 | RREB1       | -0.17                               | -0.17                 | 0.74          | 0.742885 |
| DAB2        | -0.53                               | -0.73                 | 0.93          | 0.997652 | RIMS1       | -0.17                               | -0.17                 | 0.87          | 0.94063  |
| RTKN        | -0.53                               | -0.53                 | 0.7           | 0.996007 | AKIRIN1     | -0.17                               | -0.19                 | 0.65          | 0.927232 |
| NTN4        | -0.52                               | -0.52                 | 0.7           | 0.982168 | ABCA1       | -0.17                               | -0.17                 | 0.99          | 0.960825 |
| SCAMP3      | -0.52                               | -0.62                 | 0.39          | 0.795711 | TBC1D14     | -0.17                               | -0.17                 | 0.33          | 0.912571 |
| OTX2        | -0.51                               | -0.51                 | 0.57          | 0.929034 | ROCK1       | -0.17                               | -0.19                 | > 0.99        | 0.700584 |
| RNF170      | -0.51                               | -0.52                 | 0.85          | 0.864006 | GDNF        | -0.17                               | -0.17                 | 0.58          | 0.732602 |
| UXS1        | -0.5                                | -0.5                  | 0.78          | 0.985649 | ZFYVE9      | -0.16                               | -0.42                 | 0.93          | 0.942182 |
| SEMA3A      | -0.49                               | -0.58                 | 0.98          | 0.999759 | ERN1        | -0.16                               | -0.17                 | 0.9           | 0.957114 |
| MEST        | -0.49                               | -0.6                  | 0.77          | 0.799471 | ARHGAP12    | -0.16                               | -0.16                 | 0.38          | 0.931137 |
| FAM135A     | -0.47                               | -0.47                 | 0.88          | 0.79282  | ABR         | -0.16                               | -0.16                 | 0.61          | 0.715615 |
| MPZL2       | -0.47                               | -0.77                 | 0.78          | 0.983932 | CFL2        | -0.15                               | -0.43                 | 0.82          | 0.818795 |
| ADPGK       | -0.47                               | -0.47                 | 0.78          | 0.860312 | NRAS        | -0.15                               | -0.53                 | 0.87          | 0.946294 |
| MBTD1       | -0.46                               | -0.46                 | 0.72          | 0.929347 | SSBP3       | -0.15                               | -0.21                 | 0.69          | 0.755927 |
| CAMSAP2     | -0.44                               | -0.44                 | 0.89          | 0.988622 | KIF21A      | -0.15                               | -0.15                 | 0.53          | 0.924933 |
| CASZ1       | -0.44                               | -0.44                 | 0.93          | 0.985079 | CDC37L1     | -0.15                               | -0.26                 | 0.9           | 0.931664 |
| SPSB4       | -0.44                               | -0.44                 | 0.88          | 0.818235 | SPATS2      | -0.15                               | -0.33                 | 0.78          | 0.951666 |
| UBASH3A     | -0.44                               | -0.44                 | < 0.1         | 0.740245 | AKAP12      | -0.15                               | -0.18                 | 0.78          | 0.952811 |
| YES1        | -0.43                               | -0.43                 | 0.98          | 0.994265 | EIF4A2      | -0.14                               | -0.19                 | 0.4           | 0.738121 |
| SRGAP2      | -0.43                               | -0.49                 | > 0.99        | 0.935824 | PDGFD       | -0.14                               | -0.43                 | 0.18          | 0.716554 |
| ACTB        | -0.43                               | -0.45                 | 0.76          | 0.985066 | BACH2       | -0.14                               | -0.14                 | 0.78          | 0.831347 |
| BTF3L4      | -0.43                               | -0.44                 | 0.5           | 0.721509 | LHFPL2      | -0.14                               | -0.14                 | 0.71          | 0.76497  |
| SPOP        | -0.43                               | -0.43                 | 0.35          | 0.96767  | FAXC        | -0.14                               | -0.14                 | 0.65          | 0.834146 |
| GABARAPL2   | -0.42                               | -0.42                 | 0.61          | 0.838191 | MAP3K11     | -0.14                               | -0.14                 | 0.71          | 0.770841 |
| DAW1        | -0.41                               | -0.41                 | ORF           | 0.824445 | ONECUT2     | -0.14                               | -0.15                 | 0.62          | 0.919817 |
| ABHD17B     | -0.41                               | -0.41                 | 0.75          | 0.982999 | CSMD3       | -0.14                               | -0.14                 | 0.57          | 0.704122 |
| ERG         | -0.41                               | -0.41                 | 0.91          | 0.904573 | NAA40       | -0.13                               | -0.2                  | 0.91          | 0.780867 |
| MKL2        | -0.41                               | -0.41                 | > 0.99        | 0.907962 | APIG1       | -0.13                               | -0.14                 | 0.49          | 0.897918 |
| LDLRAD3     | -0.41                               | -0.41                 | 0.94          | 0.987876 | DLC1        | -0.13                               | -0.14                 | 0.98          | 0.790943 |
| CTNNBIP1    | -0.41                               | -0.59                 | 0.9           | 0.979857 | CACHD1      | -0.13                               | -0.13                 | 0.53          | 0.770038 |
| CAMK1D      | -0.4                                | -0.44                 | 0.99          | 0.922844 | RNF216      | -0.13                               | -0.18                 | 0.78          | 0.945081 |
| NEDD9       | -0.39                               | -0.39                 | 0.88          | 0.99835  | DENND5B     | -0.12                               | -0.13                 | 0.77          | 0.776691 |
| PPP4R2      | -0.39                               | -0.39                 | 0.83          | 0.964532 | EFNA3       | -0.12                               | -0.3                  | 0.37          | 0.809025 |
| CDO1        | -0.39                               | -0.39                 | 0.44          | 0.926782 | FNDC3B      | -0.12                               | -0.2                  | 0.56          | 0.965382 |
| CCDC25      | -0.38                               | -0.39                 | 0.84          | 0.947156 | PLXNA2      | -0.12                               | -0.12                 | 0.66          | 0.726211 |
| ELMO1       | -0.38                               | -0.38                 | 0.89          | 0.94292  | PURA        | -0.12                               | -0.23                 | 0.78          | 0.945279 |
| PAN2        | -0.38                               | -0.38                 | 0.78          | 0.963907 | PLAGL2      | -0.12                               | -0.19                 | 0.67          | 0.785642 |
| H2AFX       | -0.37                               | -0.37                 | 0.74          | 0.720457 | LRRC16A     | -0.12                               | -0.12                 | 0.42          | 0.803012 |
| EBF3        | -0.37                               | -0.42                 | 0.86          | 0.920238 | UGCG        | -0.12                               | -0.12                 | 0.58          | 0.858846 |
| CTNND1      | -0.37                               | -0.37                 | 0.89          | 0.852615 | SLC25A25    | -0.11                               | -0.12                 | 0.65          | 0.779924 |
| TNFRSF11B   | -0.36                               | -0.36                 | 0.43          | 0.872078 | FNDC3A      | -0.11                               | -0.16                 | 0.55          | 0.816107 |
| PCSK5       | -0.36                               | -0.36                 | 0.68          | 0.953307 | KLHL15      | -0.11                               | -0.11                 | 0.69          | 0.724496 |
| ERLIN1      | -0.35                               | -0.36                 | 0.96          | 0.929362 | HNRNPH2     | -0.11                               | -0.71                 | 0.62          | 0.996289 |
| DUSP6       | -0.35                               | -0.35                 | 0.9           | 0.954825 | ZBTB10      | -0.1                                | -0.15                 | 0.94          | 0.917429 |
| ZHX2        | -0.34                               | -0.34                 | 0.83          | 0.829234 | TRIO        | -0.1                                | -0.32                 | 0.85          | 0.930811 |
| CITED2      | -0.34                               | -0.42                 | 0.68          | 0.8771   | RAB14       | -0.1                                | -0.29                 | 0.68          | 0.90319  |
| GMFB        | -0.33                               | -0.51                 | 0.98          | 0.829209 | BICC1       | -0.1                                | -0.1                  | 0.69          | 0.796465 |
| NUAK1       | -0.33                               | -0.33                 | 0.99          | 0.951275 | UBN2        | -0.1                                | -0.12                 | 0.86          | 0.935107 |

|          |       |       |      |          |          |       |       |        |          |
|----------|-------|-------|------|----------|----------|-------|-------|--------|----------|
| MAGI2    | -0.33 | -0.33 | 0.86 | 0.912266 | SOS2     | -0.1  | -0.1  | 0.58   | 0.75894  |
| GTPBP8   | -0.32 | -0.68 | 0.44 | 0.706368 | ACSL4    | -0.09 | -0.16 | 0.68   | 0.802012 |
| DERL2    | -0.32 | -0.35 | 0.75 | 0.877265 | POU6F2   | -0.09 | -0.09 | 0.56   | 0.932484 |
| GGT7     | -0.31 | -0.31 | 0.29 | 0.824598 | CARF     | -0.09 | -0.12 | 0.13   | 0.924729 |
| STAM     | -0.31 | -0.35 | 0.84 | 0.723395 | ADCYAP1  | -0.08 | -0.73 | 0.31   | 0.946055 |
| SRGAP1   | -0.31 | -0.35 | 0.96 | 0.982833 | MICAL3   | -0.08 | -0.08 | 0.97   | 0.745035 |
| YTHDC1   | -0.3  | -0.43 | 0.94 | 0.832085 | ZDHHC9   | -0.08 | -0.08 | 0.45   | 0.720887 |
| DACH1    | -0.3  | -0.3  | 0.76 | 0.850352 | RBPM2    | -0.07 | -0.33 | 0.74   | 0.928339 |
| XRN1     | -0.3  | -0.31 | 0.7  | 0.873308 | MRGBP    | -0.07 | -0.34 | 0.54   | 0.706744 |
| SERINC5  | -0.3  | -0.32 | 0.81 | 0.799004 | FLNB     | -0.07 | -0.08 | 0.75   | 0.788112 |
| GRB10    | -0.3  | -0.3  | 0.7  | 0.968735 | GPHN     | -0.07 | -0.07 | ORF    | 0.760945 |
| BBIP1    | -0.29 | -0.29 | ORF  | 0.72055  | NUFIP2   | -0.07 | -0.4  | 0.95   | 0.950969 |
| PLCE1    | -0.29 | -0.29 | 0.88 | 0.949073 | ASAP2    | -0.07 | -0.16 | 0.78   | 0.909873 |
| SLC7A8   | -0.28 | -0.28 | 0.46 | 0.741942 | RFX3     | -0.07 | -0.11 | 0.64   | 0.782173 |
| OSBPL1A  | -0.28 | -0.29 | 0.22 | 0.862754 | USP31    | -0.06 | -0.21 | 0.69   | 0.988014 |
| NR4A2    | -0.28 | -0.28 | 0.31 | 0.757461 | ZDHHC14  | -0.06 | -0.4  | 0.2    | 0.738028 |
| UBA6     | -0.27 | -0.36 | 0.82 | 0.894901 | MAP3K3   | -0.06 | -0.06 | 0.36   | 0.820314 |
| SMAD3    | -0.27 | -0.35 | 0.85 | 0.779252 | CLIP1    | -0.06 | -0.1  | 0.46   | 0.971009 |
| ANKRD28  | -0.27 | -0.29 | 0.89 | 0.879218 | PSD3     | -0.06 | -0.06 | 0.76   | 0.937893 |
| JPH1     | -0.27 | -0.27 | 0.66 | 0.948413 | SFXN1    | -0.06 | -0.17 | 0.63   | 0.773642 |
| ADAM17   | -0.26 | -0.28 | 0.71 | 0.714059 | DPYSL2   | -0.05 | -0.05 | 0.69   | 0.795619 |
| GLIS3    | -0.26 | -0.26 | 0.92 | 0.984963 | RBM20    | -0.05 | -0.07 | 0.81   | 0.778074 |
| MTX3     | -0.26 | -0.28 | 0.65 | 0.956376 | ABHD5    | -0.05 | -0.25 | 0.52   | 0.797671 |
| PLCL2    | -0.26 | -0.28 | 0.56 | 0.964494 | PRR14L   | -0.05 | -0.05 | 0.18   | 0.704938 |
| DYRK1A   | -0.26 | -0.26 | 0.79 | 0.836101 | HOXC11   | -0.04 | -0.04 | ORF    | 0.83676  |
| SMAD5    | -0.26 | -0.33 | 0.83 | 0.852461 | KATNBL1  | -0.04 | -0.4  | 0.63   | 0.834385 |
| UNC119B  | -0.26 | -0.26 | 0.45 | 0.795006 | CAPRIN1  | -0.04 | -0.12 | 0.57   | 0.912714 |
| ANGPT2   | -0.26 | -0.26 | 0.91 | 0.941583 | FAM126A  | -0.04 | -0.19 | 0.74   | 0.982906 |
| MIER3    | -0.25 | -0.26 | 0.72 | 0.846603 | NFIB     | -0.04 | -0.14 | 0.72   | 0.96908  |
| ZBTB46   | -0.25 | -0.25 | 0.82 | 0.944498 | ATXN7L3  | -0.03 | -0.03 | 0.5    | 0.801344 |
| PXN      | -0.25 | -0.25 | 0.62 | 0.846161 | ATRX     | -0.03 | -0.05 | 0.65   | 0.731173 |
| CYR61    | -0.25 | -0.25 | 0.72 | 0.756683 | PLEKHH1  | -0.03 | -0.12 | 0.54   | 0.917543 |
| PTGFR    | -0.25 | -0.25 | 0.8  | 0.941631 | ADAM19   | -0.03 | -0.03 | 0.7    | 0.746902 |
| TAGLN2   | -0.24 | -0.24 | 0.68 | 0.867969 | HIC2     | -0.03 | -0.12 | 0.96   | 0.913012 |
| IPMK     | -0.24 | -0.24 | 0.74 | 0.949723 | ARHGAP19 | -0.03 | -0.03 | 0.36   | 0.764898 |
| ERF      | -0.24 | -0.25 | 0.59 | 0.79474  | SOX11    | -0.03 | -0.13 | 0.68   | 0.734613 |
| HS6ST1   | -0.23 | -0.23 | 0.79 | 0.70318  | TLN2     | -0.02 | -0.05 | 0.44   | 0.79691  |
| ARHGAP24 | -0.23 | -0.23 | 0.79 | 0.71821  | ATXN7L1  | -0.02 | -0.02 | 0.54   | 0.833306 |
| CSTF3    | -0.23 | -0.23 | 0.55 | 0.867998 | PHF21A   | -0.02 | -0.08 | 0.8    | 0.742215 |
| TTC14    | -0.23 | -0.23 | 0.41 | 0.840476 | AMOTL2   | -0.02 | -0.02 | 0.38   | 0.864452 |
| SLITRK4  | -0.23 | -0.24 | 0.27 | 0.86923  | CAPZB    | -0.02 | -0.23 | 0.82   | 0.866677 |
| AP3S1    | -0.23 | -0.23 | 0.46 | 0.951394 | SOCS7    | -0.02 | -0.19 | 0.67   | 0.947534 |
| ATXN2    | -0.22 | -0.23 | 0.79 | 0.965054 | MED13    | -0.01 | -0.16 | 0.77   | 0.984545 |
| CPEB1    | -0.22 | -0.22 | 0.63 | 0.788947 | SEMA6A   | -0.01 | -0.16 | 0.36   | 0.800489 |
| EBF1     | -0.22 | -0.39 | 0.71 | 0.847652 | INO80    | -0.01 | -0.28 | 0.82   | 0.745937 |
| LOX      | -0.22 | -0.38 | 0.71 | 0.735396 | SESN3    | -0.01 | -0.13 | 0.72   | 0.761828 |
| SNX27    | -0.21 | -0.21 | 0.89 | 0.81629  | PCBP2    | -0.01 | -0.33 | 0.45   | 0.907787 |
| PAK7     | -0.21 | -0.21 | 0.26 | 0.942968 | CDH2     | 0     | -0.13 | 0.73   | 0.899534 |
| SP9      | -0.2  | -0.2  | 0.46 | 0.7094   | ORC4     | 0     | -0.56 | 0.91   | 0.942566 |
| CAMK2D   | -0.2  | -0.2  | 0.92 | 0.840552 | SLC25A11 | 0     | -0.22 | 0.56   | 0.948354 |
| IKZF2    | -0.2  | -0.21 | 0.58 | 0.769321 | EXT1     | 0     | -0.18 | 0.45   | 0.801822 |
| SLC1A2   | -0.2  | -0.2  | 0.44 | 0.777873 | ZBTB20   | 0     | -0.4  | > 0.99 | 0.987385 |
| REV3L    | -0.2  | -0.26 | 0.72 | 0.995828 | TGFBR2   | 0     | -0.13 | 0.93   | 0.971561 |
| DOCK9    | -0.2  | -0.36 | 0.59 | 0.910929 | INSIG1   | 0     | -0.53 | 0.78   | 0.963813 |
| TRIM2    | -0.19 | -0.19 | 0.59 | 0.993785 |          |       |       |        |          |

ORF, Open Reading Frame
