# Supplementary material for: Downregulation of circulating miR 802‐5p and miR 194‐5p and upregulation of brain MEF2C along breast cancer brain metastasization
Source: PubMed Central journal article supplement (PMC7053247; doi:10.1002/1878-0261.12632), 2020-02-05
Supplement: MOL2-14-520-s007.pdf [file MOL2-14-520-s007.pdf]

**Supplementary Table 7.** Results of the target prediction for miR-338-3p using TargetScan v.7.2 an Diana Tools MicroT-CDS v.5.0.

| Target Gene | Cumulative weighted context++ score | Total context++ score | Aggregate PCT | MiTG      | Target Gene | Cumulative weighted context++ score | Total context++ score | Aggregate PCT | MiTG      |
|-------------|-------------------------------------|-----------------------|---------------|-----------|-------------|-------------------------------------|-----------------------|---------------|-----------|
| COX4I1      | -0.75                               | -0.75                 | < 0.1         | 0.9380724 | ACTR2       | -0.16                               | -0.2                  | < 0.1         | 0.7900001 |
| ETS1        | -0.72                               | -0.75                 | 0.42          | 0.9949579 | EHF         | -0.16                               | -0.48                 | 0.16          | 0.7767183 |
| DCAF12      | -0.7                                | -0.7                  | 0.26          | 0.972957  | PCDH1       | -0.16                               | -0.16                 | < 0.1         | 0.8347269 |
| PVALB       | -0.66                               | -0.66                 | < 0.1         | 0.9860406 | UBFD1       | -0.16                               | -0.16                 | 0.31          | 0.872668  |
| ARHGEF10L   | -0.61                               | -0.62                 | < 0.1         | 0.9669559 | CBFB        | -0.16                               | -0.19                 | 0.16          | 0.8237471 |
| CHTOP       | -0.57                               | -0.6                  | 0.26          | 0.9230866 | PPP1R3F     | -0.16                               | -0.16                 | 0.31          | 0.7460611 |
| FAM89B      | -0.56                               | -0.56                 | < 0.1         | 0.9650825 | SOX4        | -0.15                               | -0.15                 | 0.31          | 0.7883954 |
| MTUS1       | -0.54                               | -0.54                 | 0.24          | 0.9867335 | WNK1        | -0.15                               | -0.21                 | 0.42          | 0.7124502 |
| ZKBP1A      | -0.54                               | -0.61                 | 0.3           | 0.971708  | EYA3        | -0.15                               | -0.15                 | 0.28          | 0.7591097 |
| ZBTB18      | -0.54                               | -0.54                 | 0.49          | 0.9992805 | CPEB3       | -0.15                               | -0.16                 | 0.16          | 0.7405411 |
| TANGO2      | -0.52                               | -0.71                 | < 0.1         | 0.8322809 | NR3C2       | -0.14                               | -0.14                 | 0.31          | 0.7402534 |
| LSM5        | -0.47                               | -0.47                 | ORF           | 0.7011449 | PLD1        | -0.14                               | -0.15                 | < 0.1         | 0.7580102 |
| UBE2Q1      | -0.43                               | -0.54                 | 0.42          | 0.9229805 | LRRC59      | -0.14                               | -0.14                 | 0.31          | 0.8393531 |
| ZBTB10      | -0.43                               | -0.47                 | 0.27          | 0.9881244 | DCUN1D3     | -0.14                               | -0.23                 | 0.42          | 0.7474078 |
| MACROD2     | -0.42                               | -0.42                 | < 0.1         | 0.9692401 | MYCBP2      | -0.13                               | -0.14                 | 0.16          | 0.8707677 |
| TRIM33      | -0.42                               | -0.57                 | 0.18          | 0.9819272 | FAF1        | -0.13                               | -0.32                 | 0.31          | 0.8590793 |
| GNG12       | -0.42                               | -0.43                 | < 0.1         | 0.7042908 | ZFP36L1     | -0.13                               | -0.16                 | < 0.1         | #N/D      |
| NOVA1       | -0.41                               | -0.41                 | 0.3           | 0.9342027 | AGPAT5      | -0.12                               | -0.14                 | 0.31          | 0.8383913 |
| SH2D4A      | -0.4                                | -0.42                 | < 0.1         | 0.851939  | PIGO        | -0.12                               | -0.12                 | 0.31          | 0.723293  |
| HMOX2       | -0.39                               | -0.49                 | 0.21          | 0.7894541 | SON         | -0.12                               | -0.12                 | 0.3           | 0.7047923 |
| ATXN7L1     | -0.38                               | -0.38                 | 0.17          | 0.7460288 | SNX30       | -0.11                               | -0.13                 | 0.28          | 0.9268788 |
| COL1A1      | -0.37                               | -0.55                 | 0.36          | 0.8815427 | TNRC6B      | -0.11                               | -0.15                 | 0.28          | 0.9995629 |
| ARGLU1      | -0.36                               | -0.36                 | 0.16          | 0.7713511 | RPH3A       | -0.11                               | -0.11                 | 0.29          | 0.7705824 |
| KCNMB2      | -0.36                               | -0.36                 | < 0.1         | 0.7854116 | SMTN        | -0.11                               | -0.11                 | ORF           | 0.7733784 |
| ZDHHC21     | -0.36                               | -0.36                 | 0.28          | 0.9910414 | ATXN7L3B    | -0.11                               | -0.24                 | 0.26          | 0.8623476 |
| CHP1        | -0.36                               | -0.36                 | < 0.1         | 0.7753897 | MMS19       | -0.11                               | -0.19                 | 0.16          | 0.7696984 |
| TM6SF1      | -0.35                               | -0.35                 | ORF           | 0.9977317 | N4BP2L1     | -0.1                                | -0.1                  | 0.16          | 0.7476188 |
| CRK         | -0.35                               | -0.35                 | 0.11          | 0.9431008 | TERF2       | -0.1                                | -0.38                 | 0.28          | 0.9540062 |
| LARP4       | -0.34                               | -0.34                 | 0.28          | 0.8933113 | ZFHX4       | -0.1                                | -0.1                  | 0.16          | 0.8520022 |
| VAV3        | -0.34                               | -0.34                 | 0.3           | 0.9359297 | SPCS2       | -0.1                                | -0.1                  | 0.31          | 0.8454879 |
| MAFB        | -0.33                               | -0.34                 | 0.28          | 0.9921495 | STAG2       | -0.1                                | -0.1                  | 0.3           | 0.7948353 |
| NUFIP2      | -0.31                               | -0.4                  | 0.28          | 0.9676238 | PPP1R1A     | -0.1                                | -0.12                 | 0.31          | 0.7311639 |
| LAS1L       | -0.31                               | -0.31                 | ORF           | 0.772756  | SOX6        | -0.09                               | -0.27                 | 0.48          | 0.9982879 |
| IDE         | -0.31                               | -0.4                  | 0.28          | 0.8524781 | ARMCX3      | -0.09                               | -0.42                 | < 0.1         | 0.9973385 |
| OTOF        | -0.3                                | -0.3                  | < 0.1         | 0.8227932 | PPP4R1      | -0.09                               | -0.23                 | 0.16          | 0.8466454 |
| SLC27A4     | -0.3                                | -0.3                  | < 0.1         | 0.8811743 | RUNX2       | -0.09                               | -0.09                 | < 0.1         | 0.7182284 |
| TAF1        | -0.29                               | -0.29                 | < 0.1         | 0.7831152 | HERPUD2     | -0.09                               | -0.53                 | 0.43          | 0.9724498 |
| ZDHHC18     | -0.29                               | -0.29                 | 0.3           | 0.8428726 | DALRD3      | -0.09                               | -0.09                 | ORF           | #N/D      |
| CACNB4      | -0.29                               | -0.36                 | 0.41          | 0.9562029 | CADM2       | -0.08                               | -0.08                 | 0.31          | 0.7774932 |
| LMO3        | -0.28                               | -0.3                  | 0.31          | 0.8672118 | THSD7A      | -0.08                               | -0.08                 | < 0.1         | 0.8739137 |
| TPM3        | -0.28                               | -0.29                 | 0.31          | 0.9909119 | NFIA        | -0.08                               | -0.08                 | 0.31          | 0.8318581 |
| GNAQ        | -0.28                               | -0.28                 | 0.19          | 0.9962759 | DUOX1       | -0.08                               | -0.08                 | 0.16          | 0.7466762 |
| NOL4        | -0.28                               | -0.28                 | 0.13          | 0.8304263 | FBXO33      | -0.08                               | -0.08                 | 0.16          | 0.7217258 |
| KCND2       | -0.28                               | -0.28                 | < 0.1         | 0.9987481 | PKD2        | -0.07                               | -0.07                 | 0.16          | 0.762356  |
| JMJD1C      | -0.28                               | -0.28                 | < 0.1         | 0.7738174 | MSI2        | -0.07                               | -0.5                  | < 0.1         | 0.8661454 |
| FGD1        | -0.27                               | -0.27                 | 0.16          | 0.7298374 | LSM14A      | -0.07                               | -0.11                 | 0.3           | 0.7494714 |
| MAP3K2      | -0.27                               | -0.4                  | 0.3           | 0.7912599 | ATG9A       | -0.07                               | -0.07                 | 0.29          | 0.7307564 |
| CELSR2      | -0.26                               | -0.26                 | 0.26          | 0.9993673 | FRRS1L      | -0.07                               | -0.07                 | 0.27          | 0.8048913 |
| PHF20       | -0.26                               | -0.27                 | < 0.1         | 0.7955877 | ABCA9       | -0.07                               | -0.07                 | ORF           | 0.7806699 |
| UPK1B       | -0.25                               | -0.25                 | 0.31          | 0.7491649 | ZFAND3      | -0.07                               | -0.11                 | 0.31          | 0.7451599 |
| PTPN12      | -0.25                               | -0.25                 | 0.31          | 0.9467405 | TANC2       | -0.07                               | -0.09                 | 0.31          | 0.7704626 |
| SALL1       | -0.24                               | -0.37                 | 0.52          | 0.9488729 | DAB2IP      | -0.06                               | -0.06                 | 0.42          | 0.9180276 |
| TBC1D8      | -0.24                               | -0.31                 | 0.16          | 0.8006183 | SH3PXD2A    | -0.06                               | -0.06                 | 0.31          | 0.7403022 |
| SRGAP3      | -0.24                               | -0.43                 | 0.28          | 0.9539175 | MEF2C       | -0.06                               | -0.28                 | 0.39          | 0.9557015 |
| SNAP29      | -0.23                               | -0.65                 | < 0.1         | 0.8771082 | MORC4       | -0.05                               | -0.05                 | ORF           | 0.8936153 |

|          |       |       |       |           |          |       |       |       |           |
|----------|-------|-------|-------|-----------|----------|-------|-------|-------|-----------|
| FAM120A  | -0.23 | -0.23 | < 0.1 | 0.9196756 | ATXN7L3  | -0.05 | -0.06 | 0.16  | 0.827499  |
| AAK1     | -0.22 | -0.29 | 0.36  | 0.8111581 | B4GALT7  | -0.04 | -0.71 | < 0.1 | 0.9763423 |
| EN1      | -0.22 | -0.22 | 0.3   | 0.7724608 | ANKRD52  | -0.04 | -0.07 | 0.31  | 0.735103  |
| RGS7BP   | -0.22 | -0.22 | 0.28  | 0.8376002 | ATF2     | -0.04 | -0.06 | 0.16  | 0.7074413 |
| ZBTB43   | -0.22 | -0.22 | 0.28  | 0.9916705 | SHISA6   | -0.04 | -0.04 | 0.31  | 0.7072809 |
| VAMP2    | -0.22 | -0.22 | 0.37  | 0.7005771 | SERINC5  | -0.04 | -0.04 | 0.16  | 0.7677604 |
| PTPLB    | -0.22 | -0.22 | 0.28  | 0.93297   | ZBTB39   | -0.04 | -0.04 | 0.42  | 0.7347073 |
| DUSP16   | -0.22 | -0.43 | 0.26  | 0.9944911 | ESR2     | -0.03 | -0.03 | < 0.1 | 0.817803  |
| UBE2G1   | -0.21 | -0.21 | 0.31  | 0.8470159 | ZBTB20   | -0.03 | -0.48 | 0.16  | 0.80438   |
| UBLCP1   | -0.21 | -0.21 | 0.31  | 0.8034128 | LHFPL4   | -0.02 | -0.38 | 0.52  | 0.894085  |
| TMEM229B | -0.21 | -0.21 | 0.31  | 0.7595688 | MAP2     | -0.02 | -0.03 | 0.16  | 0.7113841 |
| MANF     | -0.21 | -0.35 | 0.16  | 0.8511569 | CD276    | -0.02 | -0.02 | 0.3   | 0.8733738 |
| NEUROD1  | -0.2  | -0.2  | 0.16  | 0.7652747 | USP7     | -0.02 | -0.13 | 0.31  | 0.9645856 |
| MTDH     | -0.2  | -0.2  | 0.31  | 0.7470866 | GATA6    | -0.02 | -0.15 | 0.31  | 0.9014495 |
| HIVEP2   | -0.2  | -0.2  | 0.3   | 0.7563388 | ARHGAP32 | -0.02 | -0.04 | 0.31  | 0.7903784 |
| FBXW7    | -0.2  | -0.2  | 0.16  | 0.8028841 | DNMT3A   | -0.02 | -0.1  | 0.35  | 0.8108802 |
| RAB14    | -0.19 | -0.43 | 0.31  | 0.8961808 | F11R     | -0.01 | -0.29 | 0.31  | 0.8308495 |
| CACNA2D1 | -0.18 | -0.19 | < 0.1 | 0.9027537 | RNF217   | -0.01 | -0.11 | 0.31  | 0.7284629 |
| ARL5A    | -0.18 | -0.18 | 0.31  | 0.8389501 | MSL2     | -0.01 | -0.14 | 0.16  | 0.7433192 |
| CAMK2G   | -0.18 | -0.18 | 0.31  | 0.8574712 | SLC16A10 | -0.01 | -0.23 | 0.24  | 0.7546558 |
| HAPLN1   | -0.17 | -0.17 | 0.4   | 0.7415332 | HNRNPL   | 0     | -0.56 | 0.25  | 0.9357574 |
| MAF      | -0.17 | -0.17 | 0.23  | 0.7829193 | FGF10    | 0     | -0.26 | 0.16  | 0.7599578 |
| NKX2-1   | -0.17 | -0.21 | 0.31  | 0.716263  | COLEC10  | 0     | -0.25 | 0.16  | 0.8082429 |
| CAMK2A   | -0.17 | -0.17 | 0.31  | 0.9495654 |          |       |       |       |           |

ORF, Open Reading Frame
