# Supplementary material for: Downregulation of circulating miR 802‐5p and miR 194‐5p and upregulation of brain MEF2C along breast cancer brain metastasization
Source: PubMed Central journal article supplement (PMC7053247; doi:10.1002/1878-0261.12632), 2020-02-05
Supplement: MOL2-14-520-s008.pdf [file MOL2-14-520-s008.pdf]

**Supplementary Table 8.** Results of the target prediction miR-205-5p using TargetScan v.7.2. and DIANA Tools MicroT-CDS v.5.0.

| Target Gene | Cumulative weighted context++ score | Total context++ score | Aggregate PCT | MiTG        | Target Gene | Cumulative weighted context++ score | Total context++ score | Aggregate PCT | MiTG        |
|-------------|-------------------------------------|-----------------------|---------------|-------------|-------------|-------------------------------------|-----------------------|---------------|-------------|
| CHN1        | -0.92                               | -0.92                 | 0.97          | 0.999993252 | RBFOX3      | -0.15                               | -0.15                 | 0.17          | 0.73603808  |
| MTFR1L      | -0.73                               | -0.76                 | < 0.1         | 0.999525229 | ERBB4       | -0.15                               | -0.19                 | 0.84          | 0.98597218  |
| RBMX        | -0.67                               | -0.68                 | < 0.1         | 0.952901649 | LPCAT1      | -0.15                               | -0.23                 | 0.6           | 0.975751437 |
| SH3GL3      | -0.63                               | -0.63                 | ORF           | 0.733970037 | SLC24A2     | -0.15                               | -0.15                 | 0.17          | 0.778414112 |
| CDH11       | -0.6                                | -0.66                 | 0.25          | 0.981799127 | MAGI2       | -0.15                               | -0.15                 | 0.55          | 0.920241676 |
| SLC35B3     | -0.58                               | -0.66                 | 0.87          | 0.938354779 | RUNX2       | -0.15                               | -0.15                 | 0.51          | 0.848211814 |
| RNF146      | -0.58                               | -0.58                 | ORF           | 0.72278313  | FAM104A     | -0.14                               | -0.27                 | < 0.1         | 0.754973635 |
| COL16A1     | -0.56                               | -0.56                 | 0.6           | 0.926933374 | CPEB2       | -0.14                               | -0.14                 | 0.56          | 0.934905009 |
| HS3ST1      | -0.54                               | -0.55                 | 0.89          | 0.99546152  | PPP3R1      | -0.14                               | -0.14                 | 0.15          | 0.914369043 |
| SEPT4       | -0.49                               | -0.49                 | ORF           | 0.99127931  | MED1        | -0.14                               | -0.15                 | 0.12          | 0.979514007 |
| SLC35A1     | -0.49                               | -0.49                 | 0.38          | 0.991811429 | ARFGEF1     | -0.14                               | -0.18                 | 0.16          | 0.84797578  |
| GXYLT1      | -0.47                               | -0.47                 | 0.45          | 0.914210714 | USP7        | -0.14                               | -0.15                 | 0.2           | 0.857230071 |
| RCBTB1      | -0.47                               | -0.51                 | 0.18          | 0.997861681 | STK3        | -0.14                               | -0.14                 | 0.15          | 0.717986453 |
| SSBP3       | -0.46                               | -0.46                 | 0.8           | 0.919610945 | CDC27       | -0.13                               | -0.2                  | 0.55          | 0.961094045 |
| SELT        | -0.45                               | -0.45                 | 0.74          | 0.919103634 | CREBRF      | -0.13                               | -0.13                 | 0.34          | 0.825448902 |
| BICC1       | -0.43                               | -0.43                 | 0.58          | 0.984277347 | AMOT        | -0.13                               | -0.18                 | 0.25          | 0.87796691  |
| MARCKS      | -0.43                               | -0.45                 | 0.94          | 0.992188679 | DOK4        | -0.13                               | -0.24                 | 0.4           | 0.99787169  |
| NDUFA4      | -0.43                               | -0.44                 | 0.63          | 0.885879847 | TNRC6C      | -0.12                               | -0.13                 | 0.43          | 0.704901862 |
| ACSL1       | -0.43                               | -0.49                 | 0.54          | 0.999853733 | RAB11FIP1   | -0.12                               | -0.33                 | 0.77          | 0.87174434  |
| LENG9       | -0.43                               | -0.43                 | < 0.1         | 0.738991679 | GRB10       | -0.12                               | -0.15                 | 0.15          | 0.734196062 |
| ARRB2       | -0.42                               | -0.42                 | ORF           | 0.720210716 | UBIAD1      | -0.12                               | -0.25                 | 0.23          | 0.905361141 |
| RAP2B       | -0.41                               | -0.6                  | 0.72          | 0.751604115 | ZCCHC14     | -0.11                               | -0.12                 | 0.82          | 0.999888663 |
| CASC4       | -0.39                               | -0.39                 | < 0.1         | 0.999057233 | YES1        | -0.11                               | -0.12                 | 0.19          | 0.776862968 |
| CTPS2       | -0.38                               | -0.54                 | 0.27          | 0.966235919 | BCL6        | -0.11                               | -0.11                 | 0.15          | 0.801774655 |
| RTN3        | -0.34                               | -0.34                 | ORF           | 0.979534977 | PJA2        | -0.11                               | -0.24                 | < 0.1         | 0.706322003 |
| DDX5        | -0.34                               | -0.34                 | 0.36          | 0.990647314 | NAA10       | -0.11                               | -0.11                 | ORF           | 0.712775437 |
| PTPRM       | -0.34                               | -0.34                 | 0.48          | 0.980408592 | FAM84B      | -0.11                               | -0.22                 | 0.64          | 0.963696843 |
| LHFPL2      | -0.33                               | -0.33                 | 0.13          | 0.934212645 | MICAL2      | -0.11                               | -0.11                 | 0.41          | 0.992118624 |
| FAM126A     | -0.33                               | -0.43                 | 0.32          | 0.97998278  | LCOR        | -0.1                                | -0.1                  | 0.49          | 0.938548892 |
| SGMS1       | -0.32                               | -0.33                 | 0.28          | 0.88687212  | GTF3C2      | -0.1                                | -0.16                 | 0.14          | 0.832298378 |
| UBE2N       | -0.32                               | -0.35                 | 0.55          | 0.916768162 | LYSMD4      | -0.1                                | -0.1                  | 0.16          | 0.880004607 |
| NAA11       | -0.32                               | -0.32                 | < 0.1         | 0.802985979 | SMIM14      | -0.1                                | -0.1                  | 0.16          | 0.803350247 |
| CRMP1       | -0.32                               | -0.32                 | 0.15          | 0.845437419 | UBE2E3      | -0.1                                | -0.12                 | 0.15          | 0.900154621 |
| EZR         | -0.31                               | -0.4                  | 0.18          | 0.877699421 | ITGA5       | -0.09                               | -0.09                 | 0.15          | 0.870049795 |
| TMEM255A    | -0.31                               | -0.31                 | 0.37          | 0.966052396 | DNM3        | -0.09                               | -0.18                 | 0.15          | 0.941321691 |
| SBF2        | -0.31                               | -0.34                 | 0.74          | 0.998177791 | AP1G1       | -0.09                               | -0.09                 | 0.14          | 0.896858213 |
| LSAMP       | -0.31                               | -0.52                 | 0.24          | 0.970999734 | PPP1R3A     | -0.09                               | -0.09                 | 0.15          | 0.885846296 |
| ABHD17B     | -0.3                                | -0.3                  | 0.2           | 0.987641095 | UBFD1       | -0.09                               | -0.09                 | 0.15          | 0.847038958 |
| ADAMTS9     | -0.3                                | -0.3                  | 0.82          | 0.999292073 | STRBP       | -0.09                               | -0.09                 | 0.15          | 0.94855762  |
| NTNG1       | -0.29                               | -0.29                 | < 0.1         | 0.985800072 | CSF1        | -0.09                               | -0.09                 | 0.52          | 0.86669592  |
| AAK1        | -0.29                               | -0.3                  | 0.79          | 0.929579165 | KLHL31      | -0.09                               | -0.14                 | < 0.1         | 0.733184382 |
| MFNG        | -0.28                               | -0.28                 | 0.13          | 0.888952325 | KLF7        | -0.09                               | -0.13                 | 0.24          | 0.870669959 |
| ZEB2        | -0.27                               | -0.31                 | 0.2           | 0.949596923 | ACBD5       | -0.09                               | -0.09                 | 0.15          | 0.740118816 |
| CALU        | -0.27                               | -0.43                 | 0.48          | 0.926005913 | RBPMS2      | -0.09                               | -0.41                 | 0.27          | 0.847065105 |
| PHC2        | -0.27                               | -0.27                 | 0.59          | 0.999909005 | AXIN2       | -0.09                               | -0.09                 | 0.15          | 0.811660502 |
| LIMS2       | -0.26                               | -0.26                 | 0.21          | 0.882267543 | HMGB1       | -0.08                               | -0.23                 | 0.16          | 0.766985227 |
| GATA3       | -0.26                               | -0.36                 | 0.44          | 0.8607067   | STXBP6      | -0.08                               | -0.26                 | < 0.1         | 0.768967766 |
| RAB11FIP2   | -0.26                               | -0.27                 | 0.17          | 0.779180309 | SCMH1       | -0.08                               | -0.08                 | 0.46          | 0.722155904 |
| ELF1        | -0.26                               | -0.27                 | 0.16          | 0.932311147 | ETF1        | -0.08                               | -0.09                 | 0.19          | 0.892559419 |
| FBXO24      | -0.26                               | -0.26                 | < 0.1         | 0.963043192 | LRCH3       | -0.08                               | -0.34                 | 0.65          | 0.999225786 |
| RBM47       | -0.25                               | -0.25                 | 0.37          | 0.96075938  | GALNT3      | -0.08                               | -0.08                 | < 0.1         | 0.797236432 |
| ENC1        | -0.25                               | -0.26                 | 0.54          | 0.933483908 | PAFAH1B1    | -0.08                               | -0.13                 | < 0.1         | 0.709441751 |
| DGCR8       | -0.25                               | -0.25                 | 0.15          | 0.792630328 | ZEB1        | -0.08                               | -0.08                 | 0.59          | 0.95658008  |
| PHB         | -0.24                               | -0.24                 | 0.27          | 0.942033265 | KLHL15      | -0.08                               | -0.08                 | 0.34          | 0.919104238 |
| ESRRG       | -0.24                               | -0.24                 | 0.6           | 0.944665844 | KAZN        | -0.07                               | -0.21                 | 0.16          | 0.704917971 |
| MGRN1       | -0.24                               | -0.24                 | 0.91          | 0.960333878 | PTPRJ       | -0.07                               | -0.08                 | 0.52          | 0.864906774 |
| CBX1        | -0.23                               | -0.23                 | 0.3           | 0.865406798 | SRGAP1      | -0.07                               | -0.1                  | 0.13          | 0.910910396 |

|         |       |       |       |             |          |       |       |       |             |
|---------|-------|-------|-------|-------------|----------|-------|-------|-------|-------------|
| DUSP7   | -0.23 | -0.39 | 0.84  | 0.990130059 | LUC7L3   | -0.07 | -0.25 | < 0.1 | 0.773759121 |
| CNIH1   | -0.23 | -0.24 | < 0.1 | 0.727955829 | KSRI     | -0.07 | -0.07 | 0.6   | 0.754976653 |
| IRF2BPL | -0.23 | -0.23 | 0.15  | 0.847668051 | NFAT5    | -0.07 | -0.09 | 0.79  | 0.888654354 |
| FNBP1L  | -0.23 | -0.23 | 0.15  | 0.857705505 | DSC1     | -0.07 | -0.07 | ORF   | 0.816335742 |
| TBCEL   | -0.23 | -0.4  | 0.22  | 0.882258541 | POU2F1   | -0.06 | -0.07 | 0.45  | 0.988942977 |
| MLLT4   | -0.23 | -0.23 | 0.74  | 0.994133999 | WWC2     | -0.06 | -0.07 | 0.39  | 0.746953504 |
| EAF1    | -0.23 | -0.24 | < 0.1 | 0.810976238 | CCDC93   | -0.06 | -0.21 | 0.16  | 0.750168736 |
| SLC19A2 | -0.23 | -0.23 | 0.18  | 0.862316937 | HNRNPK   | -0.06 | -0.06 | 0.16  | 0.780812016 |
| VEGFA   | -0.22 | -0.23 | 0.53  | 0.964016185 | TNRC6B   | -0.05 | -0.07 | 0.15  | 0.793505058 |
| MIER3   | -0.22 | -0.25 | 0.15  | 0.794972754 | NHS      | -0.05 | -0.05 | < 0.1 | 0.792377623 |
| MMD     | -0.22 | -0.22 | < 0.1 | 0.866612867 | PRKCA    | -0.05 | -0.09 | < 0.1 | 0.872703581 |
| DLG2    | -0.22 | -0.22 | 0.6   | 0.983278957 | DDX52    | -0.05 | -0.09 | 0.16  | 0.864676578 |
| FA2H    | -0.22 | -0.22 | 0.29  | 0.803072096 | TRPS1    | -0.05 | -0.06 | 0.18  | 0.724851769 |
| ERRFI1  | -0.22 | -0.24 | 0.2   | 0.965187168 | LIN9     | -0.04 | -0.23 | 0.53  | 0.955846215 |
| HIATL1  | -0.22 | -0.22 | < 0.1 | 0.751577033 | ACTB     | -0.04 | -0.16 | < 0.1 | 0.727822925 |
| E2F1    | -0.21 | -0.21 | 0.19  | 0.772707982 | MTRF1L   | -0.04 | -0.04 | ORF   | 0.72165992  |
| CCDC43  | -0.21 | -0.21 | 0.17  | 0.892674628 | KMT2A    | -0.04 | -0.04 | 0.39  | 0.988582169 |
| IL1R1   | -0.21 | -0.21 | 0.13  | 0.888622728 | CMTM4    | -0.04 | -0.12 | 0.15  | 0.796109514 |
| RBMS1   | -0.21 | -0.21 | 0.59  | 0.922485683 | MAGI1    | -0.03 | -0.08 | 0.2   | 0.715465315 |
| RNF157  | -0.21 | -0.23 | 0.46  | 0.871539997 | PSD3     | -0.03 | -0.1  | 0.16  | 0.949168421 |
| CCDC176 | -0.21 | -0.21 | < 0.1 | 0.838593893 | TIAL1    | -0.03 | -0.03 | 0.16  | 0.802738327 |
| NACC2   | -0.21 | -0.3  | 0.97  | 0.998641047 | CDC42BPB | -0.03 | -0.03 | < 0.1 | 0.826726593 |
| CLK3    | -0.2  | -0.2  | 0.13  | 0.819476251 | SEPT3    | -0.03 | -0.03 | < 0.1 | 0.742390638 |
| PLCB1   | -0.2  | -0.2  | 0.15  | 0.999110121 | RARA     | -0.03 | -0.1  | 0.15  | 0.726973094 |
| FAM155A | -0.2  | -0.2  | 0.32  | 0.954006614 | MTMR4    | -0.03 | -0.03 | < 0.1 | 0.861373076 |
| FAM168A | -0.2  | -0.29 | 0.31  | 0.835083967 | MAP3K9   | -0.03 | -0.03 | 0.15  | 0.801937473 |
| RORA    | -0.19 | -0.23 | 0.57  | 0.993529416 | STK10    | -0.03 | -0.29 | 0.49  | 0.846486873 |
| TNR     | -0.19 | -0.19 | 0.35  | 0.831282215 | RPS6KA3  | -0.03 | -0.17 | 0.61  | 0.906383808 |
| NCOA1   | -0.19 | -0.2  | 0.29  | 0.804713828 | NSUN5    | -0.03 | -0.15 | 0.16  | 0.939357455 |
| CALCRL  | -0.19 | -0.51 | 0.86  | 0.837944438 | HOXD13   | -0.02 | -0.21 | 0.23  | 0.96584158  |
| GLIS3   | -0.18 | -0.18 | 0.45  | 0.920216282 | PDE7A    | -0.02 | -0.02 | 0.16  | 0.940721633 |
| TRAK2   | -0.18 | -0.18 | 0.26  | 0.972603855 | ARMC8    | -0.02 | -0.12 | < 0.1 | 0.914997176 |
| BAMBI   | -0.18 | -0.18 | 0.16  | 0.944987005 | MPRIIP   | -0.02 | -0.02 | < 0.1 | 0.920842137 |
| AFF1    | -0.18 | -0.3  | 0.15  | 0.763660049 | NR3C2    | -0.01 | -0.01 | 0.15  | 0.812906919 |
| UBE2G1  | -0.18 | -0.21 | 0.12  | 0.711123012 | IPPK     | -0.01 | -0.19 | 0.39  | 0.893529093 |
| FRK     | -0.18 | -0.43 | 0.98  | 0.992187598 | ANK2     | -0.01 | -0.01 | ORF   | 0.858822353 |
| PAX9    | -0.18 | -0.21 | 0.38  | 0.959988208 | LRP6     | -0.01 | -0.01 | 0.16  | 0.77409024  |
| TMEM236 | -0.18 | -0.18 | 0.33  | 0.8062065   | ARID1A   | -0.01 | -0.01 | 0.15  | 0.72157762  |
| NFIB    | -0.18 | -0.2  | 0.56  | 0.963019587 | TMEM136  | 0     | -0.14 | 0.17  | 0.766204693 |
| TMEM236 | -0.17 | -0.17 | 0.34  | 0.8062065   | PAPD5    | 0     | -0.09 | 0.84  | 0.987748336 |
| HERC3   | -0.17 | -0.21 | 0.23  | 0.871832487 | SIPA1L1  | 0     | -0.15 | 0.74  | 0.939530097 |
| VTI1B   | -0.17 | -0.2  | 0.15  | 0.760560931 | EIF4E    | 0     | -0.12 | 0.16  | 0.745426026 |
| TXNRD1  | -0.16 | -0.16 | 0.16  | 0.714739043 | TM9SF2   | 0     | -0.28 | 0.29  | 0.975710769 |
| TLK1    | -0.16 | -0.2  | 0.29  | 0.762889503 | CADM1    | 0     | -0.23 | 0.8   | 0.998396394 |
| TM9SF3  | -0.16 | -0.2  | 0.36  | 0.877885712 | ZBTB20   | 0     | -0.38 | 0.9   | 0.999816235 |
| RAB9B   | -0.15 | -0.15 | 0.32  | 0.772182941 | EPS8     | 0     | -0.1  | 0.18  | 0.814913423 |
| TTI1    | -0.15 | -0.16 | 0.15  | 0.762503424 |          |       |       |       |             |

ORF, Open Reading Frame
