# Supplementary material for: Downregulation of circulating miR 802‐5p and miR 194‐5p and upregulation of brain MEF2C along breast cancer brain metastasization
Source: PubMed Central journal article supplement (PMC7053247; doi:10.1002/1878-0261.12632), 2020-02-05
Supplement: MOL2-14-520-s009.pdf [file MOL2-14-520-s009.pdf]

**Supplementary Table 9.** Results of the target prediction for miR-92a-1-5p using TargetScan v.7.2 and Diana MicroT-CDS v.5.0.

| Target Gene | Cumulative weighted context++ score | Total context++ score | Aggregate PCT | MiTG        | Target Gene | Cumulative weighted context++ score | Total context++ score | Aggregate PCT | MiTG        |
|-------------|-------------------------------------|-----------------------|---------------|-------------|-------------|-------------------------------------|-----------------------|---------------|-------------|
| SLC25A23    | -1.27                               | -1.27                 | N/A           | 0.724338153 | RPH3AL      | -0.19                               | -0.28                 | N/A           | 0.719469008 |
| ANAPC15     | -0.75                               | -0.75                 | N/A           | 0.740113401 | ENG         | -0.18                               | -0.18                 | N/A           | 0.711306376 |
| SF3A3       | -0.67                               | -0.67                 | N/A           | 0.765194043 | ZBTB16      | -0.18                               | -0.2                  | N/A           | 0.704966765 |
| YBX3        | -0.58                               | -0.59                 | N/A           | 0.91528158  | NFIC        | -0.17                               | -0.17                 | N/A           | 0.897584357 |
| PAX5        | -0.55                               | -0.55                 | N/A           | 0.73296523  | PLEC        | -0.17                               | -0.17                 | N/A           | 0.805138175 |
| FOXP1       | -0.54                               | -0.54                 | N/A           | 0.74974079  | DUSP13      | -0.17                               | -0.17                 | N/A           | 0.725291403 |
| UBQLN4      | -0.54                               | -0.54                 | N/A           | 0.73940766  | PVR         | -0.16                               | -0.16                 | N/A           | 0.804009942 |
| PPME1       | -0.5                                | -0.5                  | N/A           | 0.993161162 | MATN1       | -0.16                               | -0.16                 | N/A           | 0.702411274 |
| CEP128      | -0.47                               | -0.47                 | N/A           | 0.710240527 | ANO5        | -0.15                               | -0.2                  | N/A           | 0.901922797 |
| MSI1        | -0.46                               | -0.46                 | N/A           | 0.883522177 | CNTN4       | -0.15                               | -0.16                 | N/A           | 0.793381793 |
| NANP        | -0.45                               | -0.45                 | N/A           | 0.765256616 | QSER1       | -0.15                               | -0.18                 | N/A           | 0.725760411 |
| WNK3        | -0.44                               | -0.44                 | N/A           | 0.906745437 | SEMA5A      | -0.14                               | -0.14                 | N/A           | 0.917690472 |
| FBXL16      | -0.41                               | -0.41                 | N/A           | 0.897573645 | PLEKHO2     | -0.14                               | -0.14                 | N/A           | 0.819790157 |
| NECAB1      | -0.4                                | -0.4                  | N/A           | 0.867738479 | WASF2       | -0.14                               | -0.14                 | N/A           | 0.723182919 |
| NECAB1      | -0.4                                | -0.4                  | N/A           | 0.797531498 | SEPT11      | -0.13                               | -0.13                 | N/A           | 0.822719738 |
| PRPF3       | -0.39                               | -0.39                 | N/A           | 0.741453403 | UGGT1       | -0.11                               | -0.32                 | N/A           | 0.731965789 |
| KCNC1       | -0.39                               | -0.39                 | N/A           | 0.704196136 | CLSTN2      | -0.1                                | -0.18                 | N/A           | 0.934204647 |
| ENSA        | -0.34                               | -0.43                 | N/A           | 0.771236868 | TNPO1       | -0.1                                | -0.1                  | N/A           | 0.96483842  |
| AAK1        | -0.31                               | -0.39                 | N/A           | 0.732052895 | DNAJC5      | -0.1                                | -0.12                 | N/A           | 0.847838553 |
| DOC2A       | -0.3                                | -0.3                  | N/A           | 0.828597686 | SLC6A17     | -0.1                                | -0.1                  | N/A           | 0.725119025 |
| TRPS1       | -0.3                                | -0.3                  | N/A           | 0.709692094 | PAPPA       | -0.09                               | -0.09                 | N/A           | 0.735435294 |
| FBXW7       | -0.29                               | -0.29                 | N/A           | 0.839990156 | ANGEL1      | -0.07                               | -0.07                 | N/A           | 0.844329569 |
| DCLK2       | -0.29                               | -0.29                 | N/A           | 0.744061585 | MLX         | -0.07                               | -0.26                 | N/A           | 0.742852151 |
| ELK1        | -0.28                               | -0.28                 | N/A           | 0.871306395 | ARPP19      | -0.06                               | -0.18                 | N/A           | 0.886682773 |
| SERPINA6    | -0.28                               | -0.28                 | N/A           | 0.716462407 | EIF4E3      | -0.05                               | -0.18                 | N/A           | 0.810498788 |
| TMEM167B    | -0.26                               | -0.26                 | N/A           | 0.784646285 | TNRC6B      | -0.04                               | -0.04                 | N/A           | 0.744628843 |
| LRRN2       | -0.26                               | -0.26                 | N/A           | 0.774779473 | NOS1        | -0.03                               | -0.03                 | N/A           | 0.816510378 |
| BACH2       | -0.26                               | -0.27                 | N/A           | 0.75160741  | WIPF2       | -0.03                               | -0.16                 | N/A           | 0.810571013 |
| SV2B        | -0.25                               | -0.35                 | N/A           | 0.822705169 | LPHN1       | -0.03                               | -0.05                 | N/A           | 0.735511748 |
| EPB42       | -0.25                               | -0.25                 | N/A           | 0.746322714 | HNF1A       | -0.02                               | -0.02                 | N/A           | 0.915450583 |
| JPH4        | -0.24                               | -0.24                 | N/A           | 0.759273395 | GAS7        | -0.01                               | -0.16                 | N/A           | 0.830489739 |
| NAV1        | -0.23                               | -0.29                 | N/A           | 0.807522062 | LIG3        | -0.01                               | -0.17                 | N/A           | 0.713390023 |
| ZBTB7A      | -0.22                               | -0.22                 | N/A           | 0.727907619 | SLC22A1     | 0                                   | -0.14                 | N/A           | 0.902476233 |
| ATP2B4      | -0.22                               | -0.22                 | N/A           | 0.709972891 | SLC16A3     | 0                                   | -0.18                 | N/A           | 0.891252288 |
| BSDC1       | -0.21                               | -0.21                 | N/A           | 0.794279074 | ZBTB20      | 0                                   | -0.05                 | N/A           | 0.868198765 |
| MMP9        | -0.21                               | -0.42                 | N/A           | 0.706774012 | ERCC6       | 0                                   | -0.01                 | N/A           | 0.78574321  |
| NTNG1       | -0.2                                | -0.2                  | N/A           | 0.812611243 | SRPK2       | 0                                   | -0.41                 | N/A           | 0.778547884 |
| POP5        | -0.2                                | -0.2                  | N/A           | 0.758119971 |             |                                     |                       |               |             |

N/A, Not applicable
