# Supplementary material for: Downregulation of circulating miR 802‐5p and miR 194‐5p and upregulation of brain MEF2C along breast cancer brain metastasization
Source: PubMed Central journal article supplement (PMC7053247; doi:10.1002/1878-0261.12632), 2020-02-05
Supplement: MOL2-14-520-s010.pdf [file MOL2-14-520-s010.pdf]

**Supplementary Table 10.** Results of the target prediction for miR-181a-3p using TargetScan v.7.2. and DIANA Tools MicroT-CDS v.5.0.

| Target Gene | Cumulative weighted context++ score | Total context++ score | Aggregate PCT | MiTG        | Target Gene | Cumulative weighted context++ score | Total context++ score | Aggregate PCT | MiTG |
|-------------|-------------------------------------|-----------------------|---------------|-------------|-------------|-------------------------------------|-----------------------|---------------|------|
| XIRP2       | -0.68                               | -0.68                 | N/A           | 0.728971265 |             |                                     |                       |               |      |

N/A, Not Applicable
